# Supplementary material
Source: PubMed Central journal article supplement (PMC8571033)
Supplement: NIHMS1730428-supplement-1.pdf [file NIHMS1730428-supplement-1.pdf]

## **Supplementary Information**

**Supplementary Figures 1 – 12**

**Supplementary Tables 1, 3-14**

**Supplementary File: Supplementary Table 2**

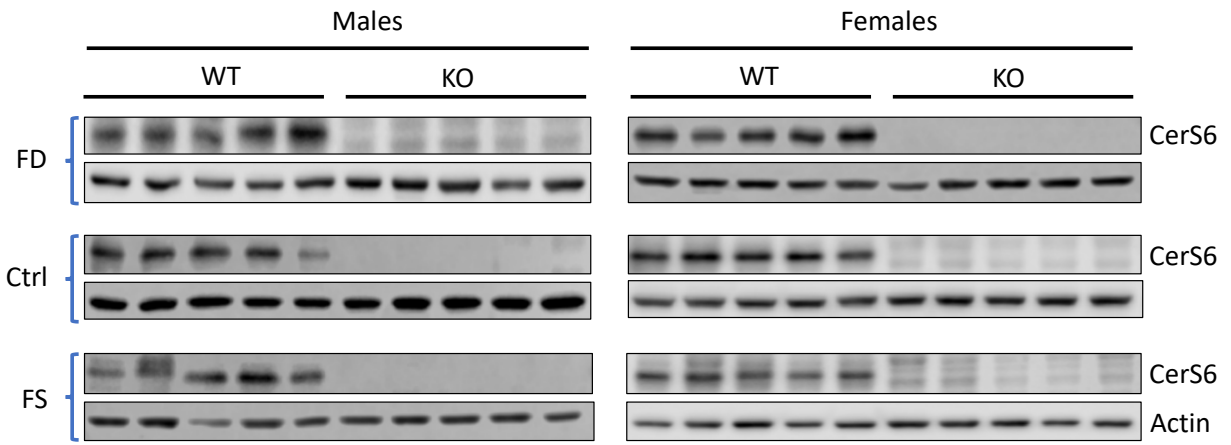

**Supplementary Figure 1.** Western blot analysis confirms lack of CerS6 expression in animals randomized to CerS6 KO groups based on -/- genotype determined by tail lysate PCR.

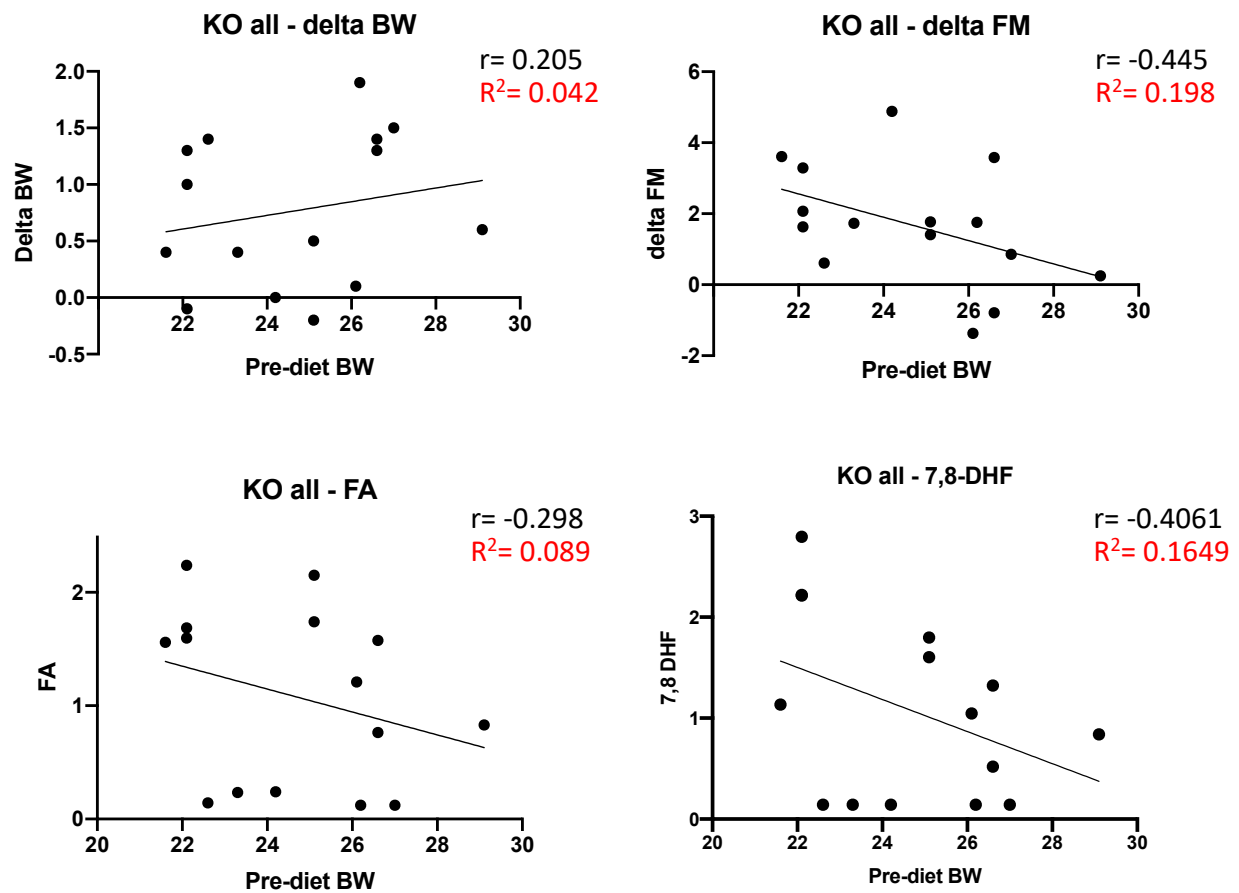

**Supplementary Figure 2.** Simple regression analysis revealed no covariation with pre-diet body weight for multiple measured parameters: body weight increase (delta BW), fat mass increase (delta FM), as well as for liver FA, DHF and 5-MTHF concentrations. Data are shown for all dietary groups including CerS6 KO male mice only.

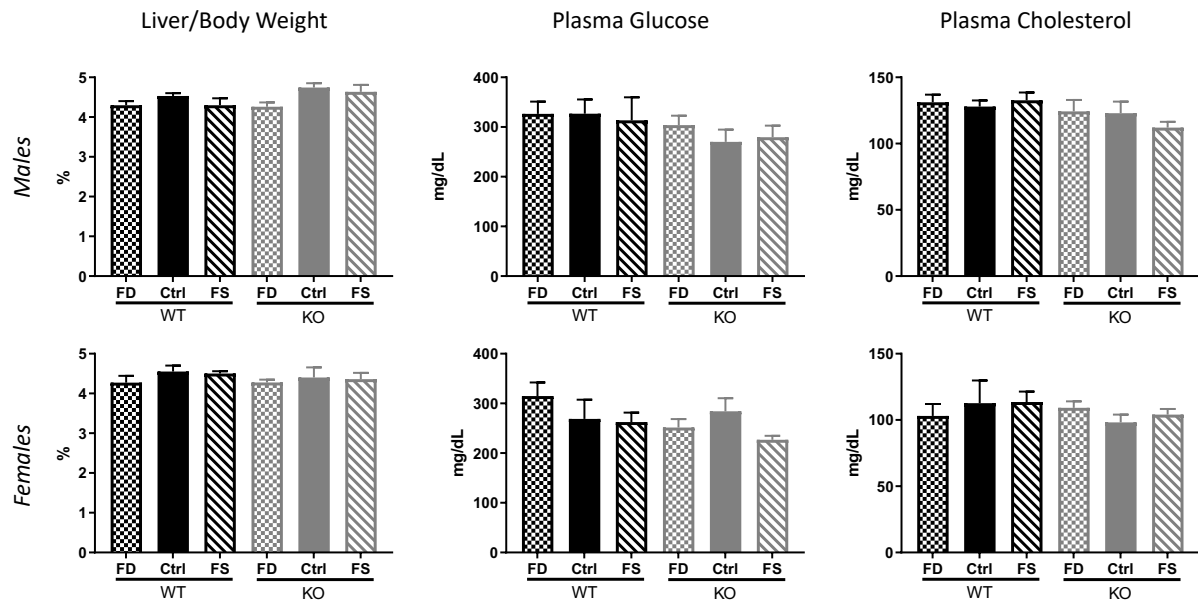

**Supplementary Figure 3.** Neither CerS6 knockout, nor dietary FA had significant effects on liver/body weight ratio, plasma glucose or plasma cholesterol. Data are shown as mean  $\pm$  SEM,  $n=5$ . Checkered bars, FD diet; solid bars, Control diet; striped bars, FS diet. WT shown in black and KO shown in grey. \*,  $p<0.05$ ; \*\*,  $p<0.01$ ; \*\*\*,  $p<0.001$ ; \*\*\*\*,  $p<0.0001$  determined by One-way ANOVA with Sidak's multiple comparisons test.

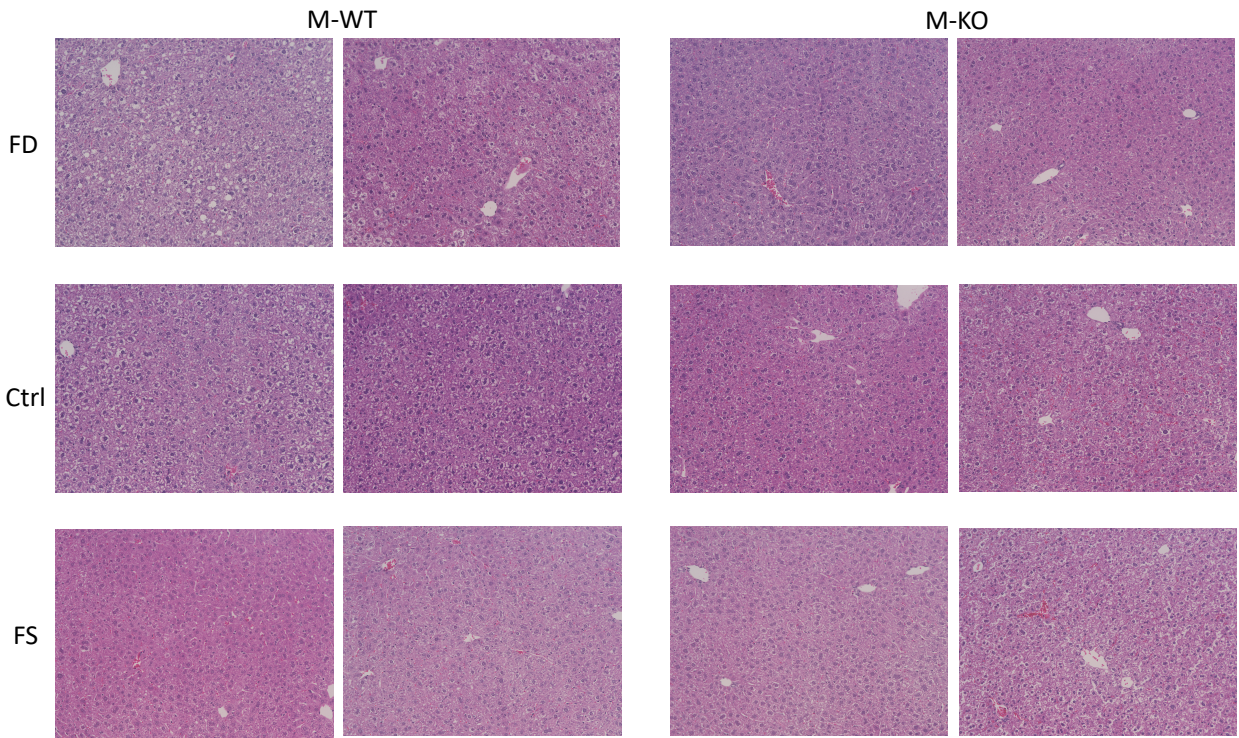

**Supplementary Figure 4.** Liver sections stained with H&E revealed no significant differences between male WT and KO mice for any diet.

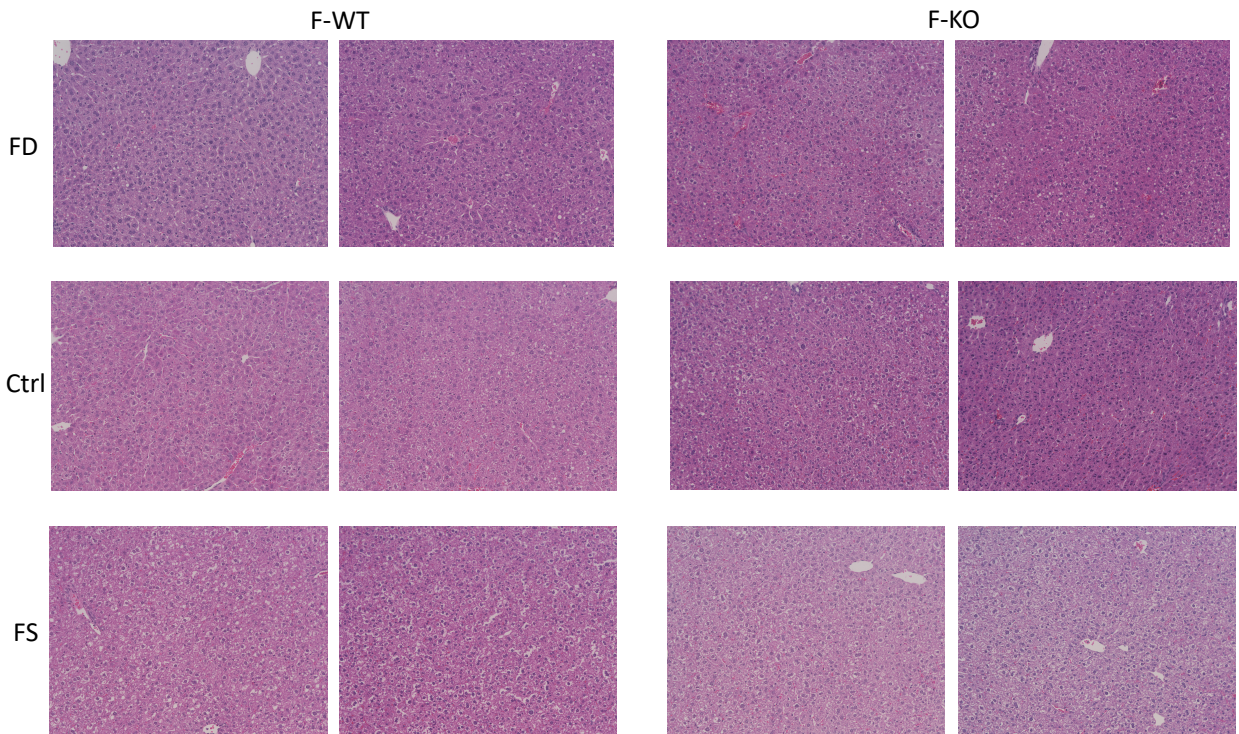

**Supplementary Figure 5.** Liver sections stained with H&E revealed no significant differences between female WT and KO mice for any diet.

## Males

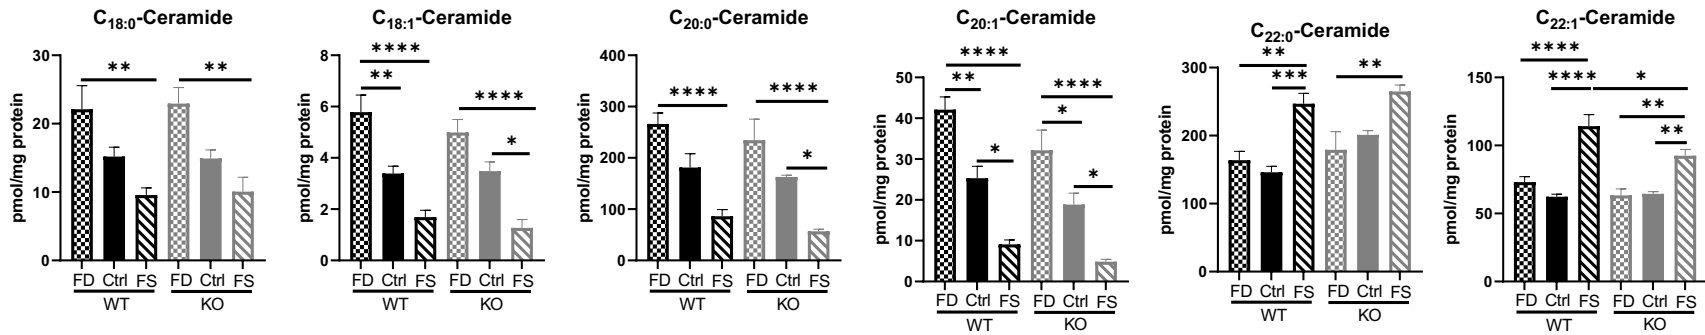

## Females

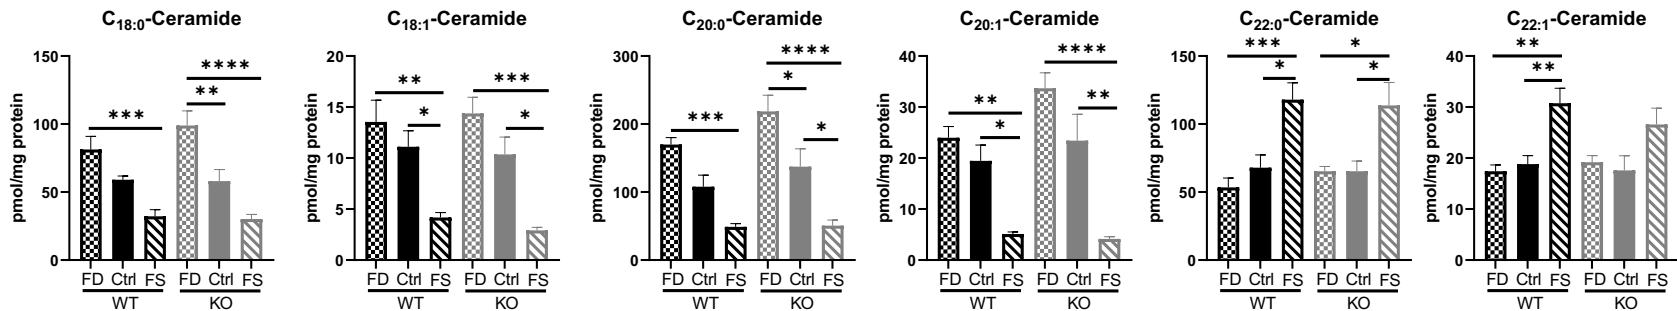

**Supplementary Figure 6.** Male and female mice demonstrated similar response to dietary FA, with long chain ceramides decreasing with increase of dietary FA while very long chain ceramide (C<sub>22</sub>- and C<sub>22:1</sub>-) increased on FS diet. Data are shown as mean  $\pm$  SEM, n=5. Checkered bars, FD diet; solid bars, Control diet; striped bars, FS diet. WT shown in black and KO shown in grey. \*, p<0.05; \*\*, p<0.01; \*\*\*, p<0.001; \*\*\*\*, p<0.0001 determined by One-way ANOVA with Sidak's multiple comparisons test.

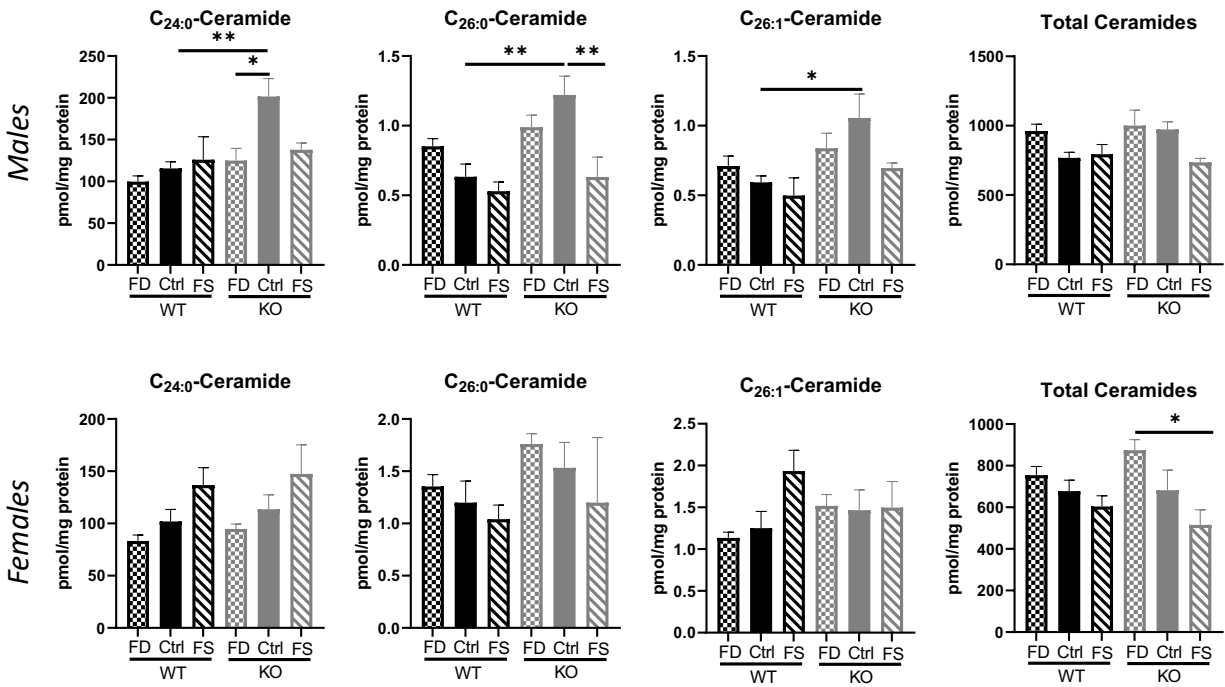

**Supplementary Figure 7.** Very long chain ceramides and the total ceramide concentrations in male and female WT and CerS6 KO mice. In male mice, an increase in very-long-chain ceramides was seen in CerS6 KO compared to WT mice on CTRL diet only, with no effect of FD diet. No significant differences in response to FA were seen in females. Data are shown as mean  $\pm$  SEM,  $n=5$ . Checkered bars, FD diet; solid bars, Control diet; striped bars, FS diet. WT shown in black and KO shown in grey. \*,  $p<0.05$ ; \*\*,  $p<0.01$ ; \*\*\*,  $p<0.001$ ; \*\*\*\*,  $p<0.0001$  determined by One-way ANOVA with Sidak's multiple comparisons test.



## Males

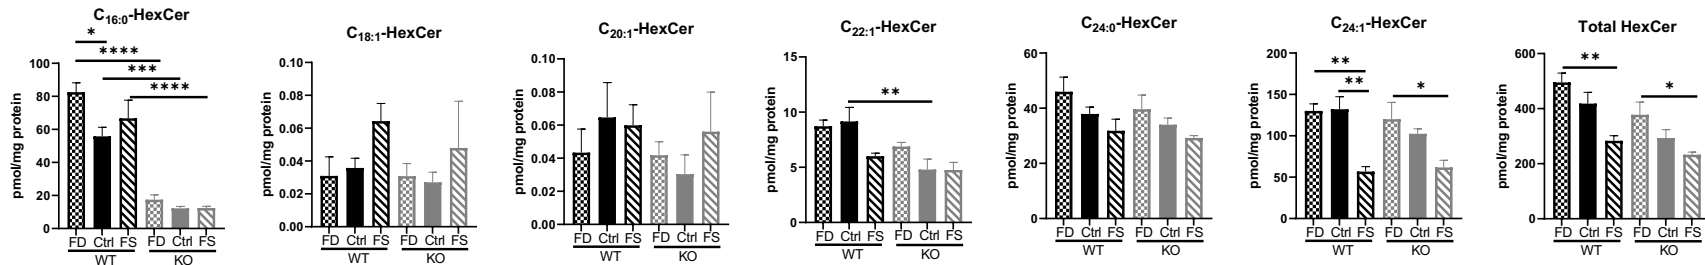

## Females

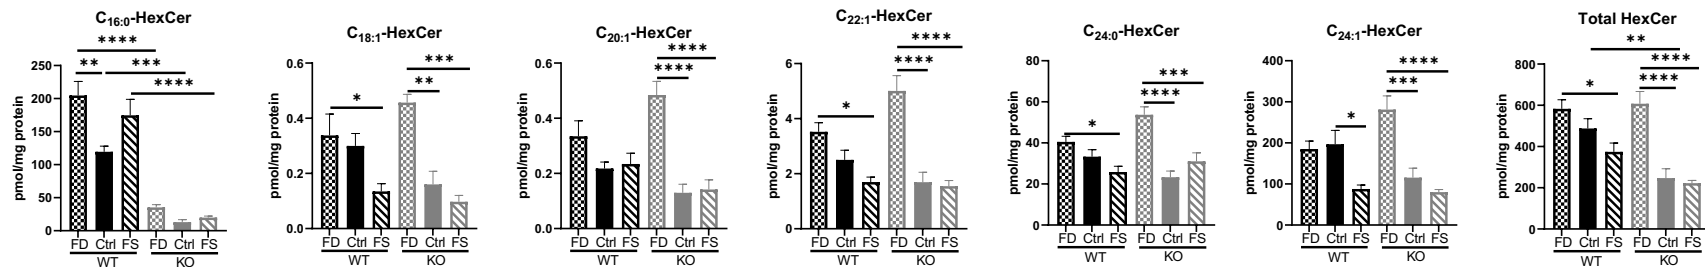

**Supplementary Figure 8.** Hexosyl ceramide species were less responsive to dietary FA in male mice, with the most pronounced change in C<sub>16:0</sub>-HexCer as well as C<sub>24:1</sub>-HexCer. In female mice, FD diet increased several HexCer species compared to CTRL and FS diets. Data are shown as mean  $\pm$  SEM, n=5. Checkered bars, FD diet; solid bars, Control diet; striped bars, FS diet. WT shown in black and KO shown in grey. \*, p<0.05; \*\*, p<0.01; \*\*\*, p<0.001; \*\*\*\*, p<0.0001 determined by One-way ANOVA with Sidak's multiple comparisons test.

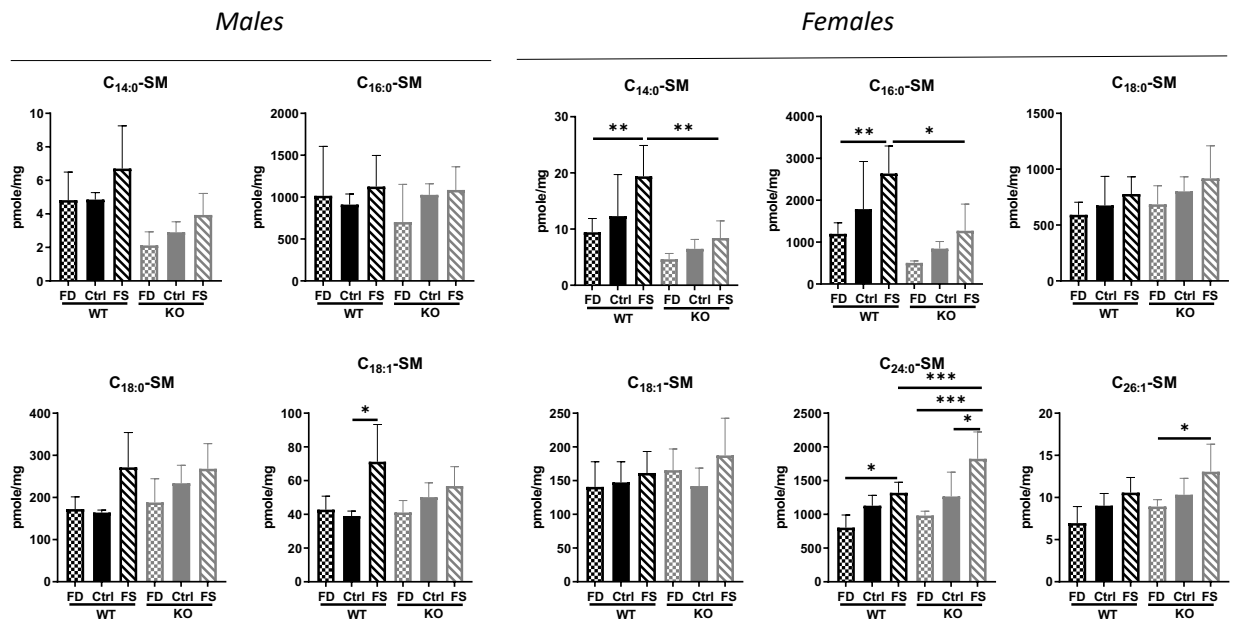

**Supplementary Figure 9.** Spingomyelins show tendency to increase on FA over-supplemented diet. No significant changes in in sphingomyelins on FS diet was seen for both WT and KO male mice but females showed significant increases of C<sub>14</sub>-, C<sub>16</sub>-, C<sub>24</sub>- and C<sub>24:1</sub>-ceramides. Data are shown as mean values  $\pm$  SEM. Checkered bars: FD diet, Solid bars: Control diet, Striped bars: FS diet. WT shown in black and KO shown in grey. \*,  $p < 0.05$ ; \*\*,  $p < 0.01$ ; \*\*\*,  $p < 0.001$ , \*\*\*\*,  $p < 0.0001$  according to One-way ANOVA with Sidak's multiple comparisons test.

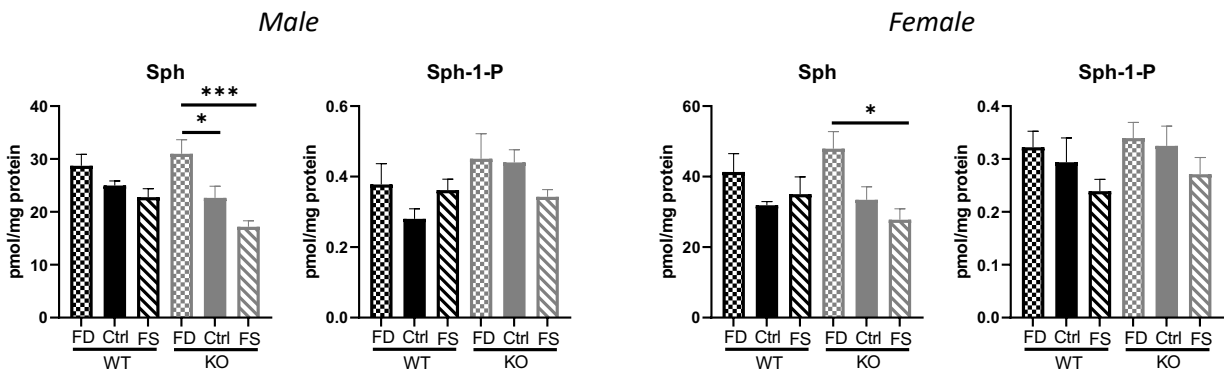

**Supplementary Figure 10.** No significant differences between diets were observed in Sphingosine-1-phosphate concentrations, but sphingosine was elevated in KO livers of both male and female mice on the FD diet with no changes in WT mice. Data are shown as mean values  $\pm$  SEM. Checkered bars: FD diet, Solid bars: Control diet, Striped bars: FS diet. WT shown in black and KO shown in grey. \*,  $p < 0.05$ ; \*\*,  $p < 0.01$ ; \*\*\*,  $p < 0.001$ , \*\*\*\*,  $p < 0.0001$  according to One-way ANOVA with Sidak's multiple comparisons test.

**a**

| Statistically Significant Biochemicals | ANOVA Main Effects   |                 |                  |                           |                            |                       |                                 |
|----------------------------------------|----------------------|-----------------|------------------|---------------------------|----------------------------|-----------------------|---------------------------------|
|                                        | Genotype Main Effect | Sex Main Effect | Diet Main Effect | Genotype: Sex Interaction | Genotype: Diet Interaction | Sex: Diet Interaction | Genotype: Sex: Diet Interaction |
| Total biochemicals $p \leq 0.05$       | 273                  | 550             | 298              | 143                       | 86                         | 112                   | 44                              |
| Total biochemicals $0.05 < p < 0.10$   | 47                   | 35              | 68               | 57                        | 44                         | 70                    | 49                              |

**b**

|                           |                 | Predicted group |                |              |           |         |         |                 |                |              |           |         |         |             |
|---------------------------|-----------------|-----------------|----------------|--------------|-----------|---------|---------|-----------------|----------------|--------------|-----------|---------|---------|-------------|
|                           |                 | CerS6 KO Ctrl F | CersS6 KO FD F | CerS6Ko FS F | WT Ctrl F | WT FD F | WT FS F | CerS6 KO Ctrl M | CersS6 KO FD M | CerS6Ko FS M | WT Ctrl M | WT FD M | WT FS M | Class Error |
| Actual group              | CerS6 KO Ctrl F | 1               | 1              | 2            | 0         | 0       | 1       | 0               | 0              | 0            | 0         | 0       | 0       | 80%         |
|                           | CersS6 KO FD F  | 0               | 5              | 0            | 0         | 0       | 0       | 0               | 0              | 0            | 0         | 0       | 0       | 0%          |
|                           | CerS6Ko FS F    | 0               | 0              | 5            | 0         | 0       | 0       | 0               | 0              | 0            | 0         | 0       | 0       | 0%          |
|                           | WT Ctrl F       | 0               | 0              | 0            | 1         | 2       | 2       | 0               | 0              | 0            | 0         | 0       | 0       | 80%         |
|                           | WT FD F         | 0               | 2              | 0            | 1         | 2       | 0       | 0               | 0              | 0            | 0         | 0       | 0       | 60%         |
|                           | WT FS F         | 0               | 0              | 0            | 0         | 0       | 5       | 0               | 0              | 0            | 0         | 0       | 0       | 0%          |
|                           | CerS6 KO Ctrl M | 0               | 0              | 0            | 0         | 0       | 0       | 3               | 1              | 1            | 0         | 0       | 0       | 40%         |
|                           | CersS6 KO FD M  | 0               | 0              | 0            | 0         | 0       | 0       | 2               | 2              | 0            | 1         | 0       | 0       | 60%         |
|                           | CerS6Ko FS M    | 0               | 0              | 0            | 0         | 0       | 0       | 0               | 1              | 4            | 0         | 0       | 0       | 20%         |
|                           | WT Ctrl M       | 0               | 0              | 0            | 0         | 0       | 0       | 0               | 0              | 0            | 4         | 1       | 0       | 20%         |
|                           | WT FD M         | 0               | 0              | 0            | 0         | 0       | 0       | 0               | 1              | 0            | 1         | 2       | 1       | 60%         |
|                           | WT FS M         | 0               | 0              | 0            | 0         | 0       | 0       | 0               | 0              | 1            | 0         | 0       | 4       | 20%         |
| Predictive accuracy = 64% |                 |                 |                |              |           |         |         |                 |                |              |           |         |         |             |

**Supplementary Figure 11.** Metabolomics data summary. (a) Numbers of biochemicals out of total 736 measured metabolites that show differences between genotypes, gender and diets, as well as interactions between genotype and gender, genotype and diet, gender and diet. (b) Random forest analysis of the metabolomic data based on the biochemicals that provide best separation between the groups gives predicted accuracy of 64% when 12 experimental groups were compared. Predictive accuracy when separation into groups is done by random chance alone is 8.3%.

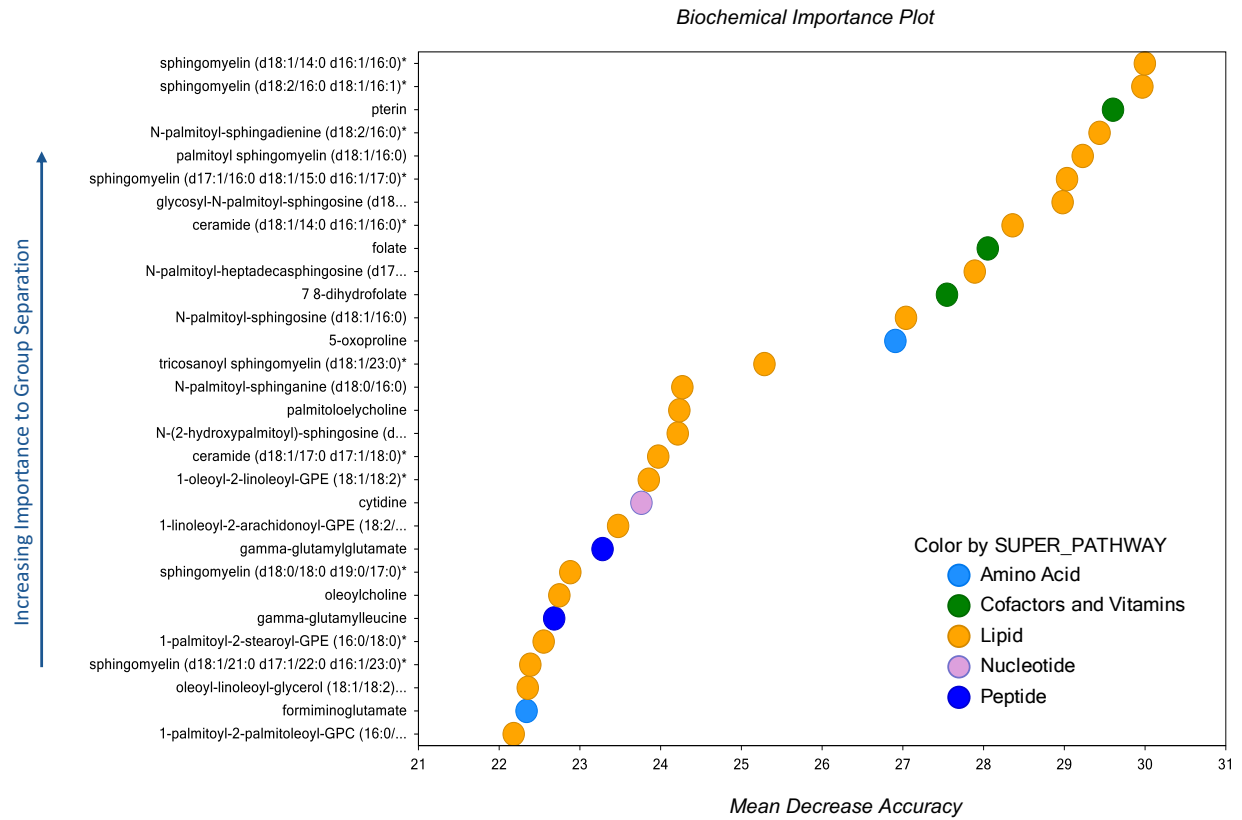

**Supplementary Figure 12.** Top 30 biochemicals ranked by their importance in separating metabolic profiles of 12 groups.

**Supplementary Table 1.** Primers used for genotyping offspring from CerS6<sup>+/-</sup> crosses.

| Primer name       | Sequence                      |
|-------------------|-------------------------------|
| CerS6 forward     | 5'-TTCGGTTAAGAATGGCCTTG-3'    |
| CerS6 KO reverse  | 5'-CCAATAAACCTCTTGCAGTTGC-3'  |
| Wild type reverse | 5'-CACACCCATATGGAACTCTTACA-3' |

**Supplementary Table 2.** Metabolomics data file: Pathways Heatmap.

**Supplementary Table 3.** CerS6 KO livers have significantly lower levels of C<sub>16</sub>-acyl chain-based ceramide (a) and sphingomyelin (b) species and significantly higher levels of very-long-chain sphingomyelins in both male and female mice.

| a                        |                                                      | Fold Change |      |      |       |      |      |             |       |       |       |       |       |
|--------------------------|------------------------------------------------------|-------------|------|------|-------|------|------|-------------|-------|-------|-------|-------|-------|
|                          |                                                      | Female      |      |      | Male  |      |      | Female Male |       |       |       |       |       |
|                          |                                                      | KO WT       |      |      | KO WT |      |      | WT          |       |       | KO    |       |       |
|                          |                                                      | CTRL        | FD   | FS   | CTRL  | FD   | FS   | CTRL        | FD    | FS    | CTRL  | FD    | FS    |
| Dihydroceramides         | N-palmitoyl-sphinganine (d18:0/16:0)                 | 0.75        | 0.63 | 0.62 | 1.05  | 1.00 | 0.75 | 1.07        | 1.28  | 1.25  | 0.76  | 0.81  | 1.03  |
| Ceramides                | N-palmitoyl-sphingosine (d18:1/16:0)                 | 0.37        | 0.35 | 0.39 | 0.74  | 0.74 | 0.48 | 1.41        | 1.58  | 1.43  | 0.70  | 0.74  | 1.16  |
|                          | N-stearoyl-sphingosine (d18:1/18:0)*                 | 1.08        | 0.90 | 1.00 | 1.20  | 1.31 | 0.89 | 2.70        | 3.99  | 2.57  | 2.43  | 2.74  | 2.89  |
|                          | ceramide (d18:1/14:0, d16:1/16:0)*                   | 0.47        | 0.47 | 0.40 | 0.29  | 0.39 | 0.27 | 1.51        | 1.94  | 1.44  | 2.46  | 2.37  | 2.11  |
|                          | ceramide (d18:1/17:0, d17:1/18:0)*                   | 0.77        | 0.60 | 0.77 | 1.00  | 0.94 | 0.70 | 1.91        | 2.66  | 1.96  | 1.48  | 1.70  | 2.17  |
|                          | ceramide (d18:1/20:0, d16:1/22:0, d20:1/18:0)*       | 1.10        | 1.10 | 1.20 | 1.08  | 1.17 | 0.96 | 0.82        | 0.84  | 0.71  | 0.83  | 0.79  | 0.90  |
|                          | ceramide (d18:2/24:1, d18:1/24:2)*                   | 1.08        | 1.03 | 1.17 | 1.06  | 1.24 | 0.97 | 0.83        | 1.02  | 0.93  | 0.84  | 0.85  | 1.12  |
|                          | N-(2-hydroxypalmitoyl)-sphingosine (d18:1/16:0(2OH)) | 0.53        | 0.49 | 0.71 | 0.69  | 0.85 | 0.49 | 0.88        | 1.05  | 0.94  | 0.68  | 0.61  | 1.37  |
|                          | N-erucyl-sphingosine (d18:1/22:1)*                   | 1.06        | 1.03 | 1.09 | 0.86  | 1.15 | 0.78 | 0.18        | 0.27  | 0.19  | 0.22  | 0.24  | 0.27  |
|                          | N-palmitoyl-sphingadienine (d18:2/16:0)*             | 0.43        | 0.36 | 0.44 | 0.59  | 0.61 | 0.50 | 0.65        | 0.79  | 0.68  | 0.47  | 0.47  | 0.59  |
|                          | N-behenoyl-sphingadienine (d18:2/22:0)*              | 0.92        | 0.94 | 1.22 | 0.96  | 0.92 | 1.03 | 0.29        | 0.25  | 0.26  | 0.27  | 0.25  | 0.31  |
| Hexosylceramides (HCER)  | N-palmitoyl-heptadecaspingosine (d17:1/16:0)*        | 0.07        | 0.07 | 0.07 | 0.09  | 0.12 | 0.08 | 1.30        | 1.68  | 1.51  | 1.03  | 0.95  | 1.28  |
|                          | glycosyl-N-palmitoyl-sphingosine (d18:1/16:0)        | 0.15        | 0.13 | 0.15 | 0.27  | 0.23 | 0.22 | 2.24        | 2.73  | 2.90  | 1.30  | 1.52  | 1.94  |
|                          | glycosyl-N-stearoyl-sphingosine (d18:1/18:0)         | 0.90        | 0.75 | 0.69 | 1.02  | 1.09 | 0.74 | 12.57       | 20.19 | 11.77 | 11.08 | 13.95 | 10.95 |
|                          | glycosyl-N-arachidoyl-sphingosine (d18:1/20:0)*      | 1.02        | 1.03 | 0.97 | 0.81  | 0.93 | 0.86 | 1.45        | 1.69  | 1.55  | 1.81  | 1.87  | 1.76  |
|                          | glycosyl-N-erucyl-sphingosine (d18:1/22:1)*          | 0.88        | 0.91 | 0.85 | 0.50  | 0.81 | 0.65 | 0.27        | 0.40  | 0.36  | 0.48  | 0.44  | 0.47  |
|                          | glycosyl ceramide (d18:1/23:1, d17:1/24:1)*          | 0.86        | 0.82 | 0.89 | 0.65  | 0.82 | 0.82 | 0.98        | 1.26  | 1.28  | 1.30  | 1.26  | 1.40  |
| Lactosylceramides (LCER) | glycosyl-N-neruconyl-sphingosine (d18:1/24:1)*       | 0.93        | 1.00 | 0.94 | 0.92  | 1.14 | 0.94 | 1.55        | 1.87  | 1.85  | 1.57  | 1.64  | 1.86  |
|                          | glycosyl ceramide (d18:2/24:1, d18:1/24:2)*          | 1.12        | 0.99 | 1.11 | 1.03  | 1.28 | 1.07 | 1.52        | 2.17  | 2.11  | 1.64  | 1.69  | 2.19  |
|                          | lactosyl-N-palmitoyl-sphingosine (d18:1/16:0)        | 0.52        | 0.35 | 0.43 | 0.36  | 0.45 | 0.52 | 1.06        | 1.21  | 1.17  | 1.54  | 0.93  | 0.96  |
|                          | lactosyl-N-neruconyl-sphingosine (d18:1/24:1)*       | 1.06        | 1.06 | 0.98 | 1.14  | 1.27 | 1.10 | 1.05        | 1.25  | 1.34  | 0.97  | 1.05  | 1.20  |

| b                       |                                                                 | Fold Change |      |      |       |      |      |             |      |      |      |      |      |
|-------------------------|-----------------------------------------------------------------|-------------|------|------|-------|------|------|-------------|------|------|------|------|------|
|                         |                                                                 | Female      |      |      | Male  |      |      | Female Male |      |      |      |      |      |
|                         |                                                                 | KO WT       |      |      | KO WT |      |      | WT          |      |      | KO   |      |      |
|                         |                                                                 | CTRL        | FD   | FS   | CTRL  | FD   | FS   | CTRL        | FD   | FS   | CTRL | FD   | FS   |
| Sphingolipid Metabolism | sphinganine                                                     | 1.22        | 1.09 | 0.94 | 1.30  | 1.28 | 0.97 | 1.54        | 1.82 | 1.85 | 1.44 | 1.54 | 1.79 |
|                         | palmitoyl dihydro sphingomyelin (d18:0/16:0)*                   | 0.92        | 0.79 | 0.91 | 0.96  | 1.04 | 0.93 | 1.44        | 1.73 | 1.53 | 1.38 | 1.32 | 1.50 |
|                         | behenoyl dihydro sphingomyelin (d18:0/22:0)*                    | 1.12        | 1.48 | 1.58 | 1.41  | 1.43 | 1.19 | 1.53        | 1.27 | 1.34 | 1.22 | 1.32 | 1.78 |
|                         | palmitoyl sphingomyelin (d18:1/16:0)                            | 0.56        | 0.46 | 0.53 | 0.70  | 0.71 | 0.64 | 2.09        | 2.30 | 1.98 | 1.67 | 1.47 | 1.62 |
|                         | stearoyl sphingomyelin (d18:1/18:0)                             | 1.17        | 1.04 | 1.28 | 1.01  | 1.14 | 1.05 | 3.55        | 4.60 | 2.84 | 4.12 | 4.18 | 3.47 |
|                         | behenoyl sphingomyelin (d18:1/22:0)*                            | 1.16        | 1.20 | 1.59 | 1.15  | 1.32 | 1.33 | 0.63        | 0.70 | 0.58 | 0.63 | 0.64 | 0.69 |
|                         | tricosanoyl sphingomyelin (d18:1/23:0)*                         | 1.25        | 1.46 | 1.65 | 1.09  | 1.34 | 1.33 | 1.97        | 2.33 | 2.13 | 2.26 | 2.54 | 2.64 |
|                         | ignoceroyl sphingomyelin (d18:1/24:0)                           | 1.01        | 1.33 | 1.49 | 1.10  | 1.46 | 1.56 | 1.21        | 1.32 | 1.36 | 1.12 | 1.20 | 1.30 |
|                         | sphingomyelin (d18:1/14:0, d16:1/16:0)*                         | 0.63        | 0.55 | 0.48 | 0.30  | 0.38 | 0.35 | 3.06        | 3.62 | 2.64 | 6.38 | 5.31 | 3.66 |
|                         | sphingomyelin (d17:1/16:0, d18:1/15:0, d16:1/17:0)*             | 0.08        | 0.07 | 0.08 | 0.10  | 0.10 | 0.11 | 2.26        | 2.21 | 2.31 | 1.95 | 1.65 | 1.73 |
|                         | sphingomyelin (d18:2/16:0, d18:1/16:1)*                         | 0.50        | 0.43 | 0.47 | 0.51  | 0.53 | 0.55 | 1.52        | 1.63 | 1.41 | 1.51 | 1.32 | 1.19 |
|                         | sphingomyelin (d18:1/17:0, d17:1/18:0, d19:1/16:0)              | 0.86        | 0.77 | 0.87 | 0.93  | 0.85 | 0.85 | 2.74        | 2.93 | 2.50 | 2.54 | 2.64 | 2.56 |
|                         | sphingomyelin (d18:1/18:1, d18:2/18:0)                          | 1.13        | 1.01 | 1.17 | 0.83  | 1.01 | 0.95 | 3.71        | 4.30 | 2.64 | 5.01 | 4.31 | 3.24 |
|                         | sphingomyelin (d18:1/20:0, d16:1/22:0)*                         | 1.28        | 1.14 | 1.52 | 1.09  | 1.21 | 1.05 | 1.27        | 1.36 | 0.95 | 1.49 | 1.28 | 1.37 |
|                         | sphingomyelin (d18:1/20:1, d18:2/20:0)*                         | 1.21        | 1.19 | 1.48 | 0.67  | 0.96 | 0.83 | 1.12        | 1.32 | 0.83 | 2.01 | 1.66 | 1.48 |
|                         | sphingomyelin (d18:1/21:0, d17:1/22:0, d16:1/23:0)*             | 1.10        | 1.11 | 1.64 | 0.88  | 0.89 | 0.96 | 0.49        | 0.49 | 0.50 | 0.61 | 0.61 | 0.85 |
|                         | sphingomyelin (d18:1/22:1, d18:2/22:0, d16:1/24:1)*             | 1.16        | 1.05 | 1.33 | 0.86  | 1.13 | 0.90 | 0.37        | 0.46 | 0.30 | 0.49 | 0.43 | 0.45 |
|                         | sphingomyelin (d18:2/23:0, d18:1/23:1, d17:1/24:1)*             | 1.08        | 1.05 | 1.11 | 0.86  | 1.04 | 0.92 | 0.97        | 1.16 | 0.99 | 1.21 | 1.17 | 1.20 |
|                         | sphingomyelin (d18:1/24:1, d18:2/24:0)*                         | 1.19        | 1.23 | 1.44 | 1.22  | 1.53 | 1.16 | 1.58        | 1.98 | 1.47 | 1.54 | 1.59 | 1.81 |
|                         | sphingomyelin (d18:2/24:1, d18:1/24:2)*                         | 1.34        | 1.14 | 1.42 | 1.04  | 1.28 | 1.10 | 1.55        | 1.92 | 1.53 | 1.99 | 1.70 | 1.97 |
|                         | sphingosine                                                     | 1.07        | 1.02 | 0.95 | 1.07  | 1.14 | 0.86 | 1.23        | 1.41 | 1.30 | 1.23 | 1.26 | 1.43 |
|                         | phytosphingosine                                                | 1.04        | 1.04 | 1.00 | 0.94  | 1.02 | 1.00 | 0.90        | 0.93 | 1.13 | 1.00 | 0.95 | 1.13 |
|                         | sphingomyelin (d18:2/23:1)*                                     | 1.08        | 0.95 | 1.27 | 0.68  | 0.89 | 0.86 | 1.43        | 1.79 | 1.40 | 2.28 | 1.91 | 2.06 |
|                         | sphingomyelin (d18:2/24:2)*                                     | 0.96        | 1.43 | 0.84 | 1.09  | 1.03 | 1.48 | 2.39        | 1.73 | 2.48 | 2.11 | 2.40 | 1.41 |
|                         | sphingomyelin (d18:1/25:0, d19:0/24:1, d20:1/23:0, d19:1/24:0)* | 1.28        | 1.06 | 1.39 | 1.27  | 1.49 | 1.63 | 1.01        | 1.61 | 1.40 | 1.02 | 1.15 | 1.20 |
|                         | sphingomyelin (d18:1/22:2, d18:2/22:1, d16:1/24:2)*             | 1.25        | 1.13 | 1.35 | 0.59  | 0.95 | 0.87 | 0.44        | 0.62 | 0.43 | 0.93 | 0.75 | 0.67 |
|                         | sphingomyelin (d18:0/20:0, d16:0/22:0)*                         | 1.69        | 1.44 | 2.31 | 1.25  | 1.73 | 1.24 | 1.10        | 2.06 | 1.18 | 1.49 | 1.71 | 2.20 |
|                         | sphingomyelin (d18:0/18:0, d19:0/17:0)*                         | 1.46        | 1.38 | 1.62 | 1.15  | 1.40 | 1.17 | 2.70        | 4.45 | 2.80 | 3.42 | 4.39 | 3.87 |
|                         | sphingomyelin (d18:1/19:0, d19:1/18:0)*                         | 1.29        | 1.02 | 1.39 | 0.91  | 0.89 | 0.88 | 1.30        | 1.47 | 1.12 | 1.84 | 1.68 | 1.78 |
|                         | heptadecaspingosine (d17:1)                                     | 0.70        | 0.67 | 0.61 | 0.57  | 0.61 | 0.58 | 0.91        | 0.91 | 1.00 | 1.10 | 1.00 | 1.05 |
|                         | hexadecaspingosine (d16:1)*                                     | 0.77        | 0.82 | 0.83 | 0.73  | 0.83 | 0.79 | 0.89        | 0.91 | 0.99 | 0.93 | 0.90 | 1.03 |
|                         | sphingadienine                                                  | 1.02        | 0.95 | 0.89 | 0.77  | 0.88 | 0.79 | 0.72        | 0.77 | 0.81 | 0.95 | 0.84 | 0.92 |

**Supplementary Table 4.** CerS6 KO significant decreased diacylglycerol species in male mice and caused significantly fewer changes in females. Additionally, multiple diacylglycerols are found at significantly higher concentrations in the KO female vs male livers (irrespective of diet), while in WT animals significantly lower number of diacylglycerol species followed the same trend.

| Sub Pathway                                         | Biochemical Name                                      | Fold Change |      |      |          |      |      |                |      |      |      |      |      |
|-----------------------------------------------------|-------------------------------------------------------|-------------|------|------|----------|------|------|----------------|------|------|------|------|------|
|                                                     |                                                       | Female      |      |      | Male     |      |      | Female<br>Male |      |      |      |      |      |
|                                                     |                                                       | KO<br>WT    |      |      | KO<br>WT |      |      | WT             |      |      | KO   |      |      |
|                                                     |                                                       | CTRL        | FD   | FS   | CTRL     | FD   | FS   | CTRL           | FD   | FS   | CTRL | FD   | FS   |
| Diacylglycerol                                      | diacylglycerol (12:0/18:1, 14:0/16:1, 16:0/14:1) [1]* | 0.73        | 2.50 | 0.85 | 0.26     | 0.55 | 0.23 | 1.20           | 0.90 | 0.96 | 3.34 | 4.11 | 3.56 |
|                                                     | diacylglycerol (12:0/18:1, 14:0/16:1, 16:0/14:1) [2]* | 0.76        | 1.23 | 0.71 | 0.39     | 0.61 | 0.39 | 0.96           | 0.84 | 0.86 | 1.86 | 1.71 | 1.56 |
|                                                     | diacylglycerol (14:0/18:1, 16:0/16:1) [1]*            | 0.87        | 1.28 | 0.78 | 0.37     | 0.62 | 0.45 | 0.90           | 0.87 | 0.88 | 2.10 | 1.81 | 1.52 |
|                                                     | diacylglycerol (14:0/18:1, 16:0/16:1) [2]*            | 0.86        | 1.19 | 0.86 | 0.47     | 0.69 | 0.51 | 0.87           | 0.85 | 0.81 | 1.61 | 1.47 | 1.37 |
|                                                     | diacylglycerol (16:1/18:2 [2], 16:0/18:3 [1])*        | 0.91        | 1.13 | 0.69 | 0.48     | 0.80 | 0.62 | 0.89           | 0.96 | 1.01 | 1.69 | 1.35 | 1.13 |
|                                                     | palmitoyl-myristoyl-glycerol (16:0/14:0) [1]*         | 0.98        | 1.47 | 0.83 | 0.35     | 0.58 | 0.45 | 0.94           | 1.06 | 1.19 | 2.66 | 2.70 | 2.19 |
|                                                     | palmitoyl-myristoyl-glycerol (16:0/14:0) [2]          | 1.01        | 1.16 | 0.92 | 0.64     | 0.77 | 0.53 | 1.29           | 1.40 | 1.11 | 2.03 | 2.10 | 1.94 |
|                                                     | palmitoyl-palmitoyl-glycerol (16:0/16:0) [2]*         | 1.02        | 1.03 | 0.91 | 0.77     | 0.82 | 0.78 | 1.13           | 1.11 | 1.18 | 1.51 | 1.39 | 1.39 |
|                                                     | palmitoyl-oleoyl-glycerol (16:0/18:1) [1]*            | 0.92        | 1.18 | 0.78 | 0.45     | 0.74 | 0.60 | 1.27           | 1.38 | 1.31 | 2.60 | 2.19 | 1.73 |
|                                                     | palmitoyl-oleoyl-glycerol (16:0/18:1) [2]*            | 0.92        | 1.12 | 0.83 | 0.56     | 0.78 | 0.67 | 1.08           | 1.08 | 1.08 | 1.76 | 1.54 | 1.34 |
|                                                     | palmitoyl-linoleoyl-glycerol (16:0/18:2) [1]*         | 1.00        | 1.08 | 0.89 | 0.78     | 0.97 | 0.77 | 1.24           | 1.26 | 1.07 | 1.59 | 1.41 | 1.23 |
|                                                     | palmitoyl-linoleoyl-glycerol (16:0/18:2) [2]*         | 1.01        | 0.99 | 0.89 | 0.86     | 0.97 | 0.89 | 1.15           | 1.15 | 1.07 | 1.35 | 1.17 | 1.07 |
|                                                     | palmitoyl-linolenoyl-glycerol (16:0/18:3) [2]*        | 0.96        | 1.36 | 0.96 | 0.55     | 0.86 | 0.77 | 1.35           | 0.81 | 1.18 | 2.32 | 1.28 | 1.47 |
|                                                     | palmitoleoyl-oleoyl-glycerol (16:1/18:1) [2]*         | 0.71        | 1.33 | 0.70 | 0.32     | 0.58 | 0.44 | 0.83           | 0.67 | 0.84 | 1.82 | 1.53 | 1.35 |
|                                                     | palmitoleoyl-linoleoyl-glycerol (16:1/18:2) [1]*      | 0.88        | 1.03 | 0.63 | 0.59     | 0.84 | 0.64 | 1.04           | 1.08 | 1.09 | 1.56 | 1.33 | 1.07 |
|                                                     | palmitoyl-arachidonoyl-glycerol (16:0/20:4) [2]*      | 0.84        | 1.13 | 0.90 | 1.08     | 1.08 | 0.95 | 1.13           | 0.82 | 0.90 | 0.88 | 0.86 | 0.85 |
|                                                     | palmitoleoyl-arachidonoyl-glycerol (16:1/20:4) [2]*   | 0.83        | 1.23 | 0.78 | 1.51     | 1.29 | 0.98 | 1.84           | 1.14 | 1.24 | 1.01 | 1.08 | 0.98 |
|                                                     | palmitoyl-docosahexaenoyl-glycerol (16:0/22:6) [1]*   | 0.84        | 0.97 | 0.87 | 0.95     | 1.01 | 0.86 | 1.22           | 1.48 | 1.15 | 1.09 | 1.42 | 1.17 |
|                                                     | palmitoyl-docosahexaenoyl-glycerol (16:0/22:6) [2]*   | 0.63        | 1.41 | 0.88 | 0.77     | 1.18 | 0.78 | 1.74           | 1.09 | 1.32 | 1.42 | 1.30 | 1.48 |
|                                                     | stearoyl-linoleoyl-glycerol (18:0/18:2) [2]*          | 0.88        | 1.13 | 0.75 | 0.83     | 0.88 | 0.92 | 1.48           | 1.31 | 1.59 | 1.57 | 1.68 | 1.29 |
|                                                     | oleoyl-oleoyl-glycerol (18:1/18:1) [1]*               | 0.85        | 1.17 | 0.63 | 0.40     | 0.76 | 0.62 | 1.38           | 1.70 | 1.84 | 2.95 | 2.62 | 1.88 |
|                                                     | oleoyl-oleoyl-glycerol (18:1/18:1) [2]*               | 0.85        | 1.13 | 0.74 | 0.46     | 0.76 | 0.64 | 1.16           | 1.24 | 1.37 | 2.16 | 1.86 | 1.59 |
|                                                     | oleoyl-linoleoyl-glycerol (18:1/18:2) [1]             | 1.00        | 1.05 | 0.71 | 0.74     | 0.99 | 0.91 | 1.35           | 1.48 | 1.69 | 1.83 | 1.58 | 1.31 |
|                                                     | oleoyl-linoleoyl-glycerol (18:1/18:2) [2]             | 0.95        | 1.05 | 0.78 | 0.64     | 0.96 | 0.93 | 1.24           | 1.37 | 1.50 | 1.84 | 1.50 | 1.26 |
|                                                     | linoleoyl-linoleoyl-glycerol (18:2/18:2) [1]*         | 1.24        | 0.90 | 0.69 | 1.24     | 1.17 | 1.23 | 1.35           | 1.37 | 1.64 | 1.35 | 1.05 | 0.92 |
|                                                     | linoleoyl-linoleoyl-glycerol (18:2/18:2) [2]*         | 0.96        | 1.20 | 0.77 | 0.96     | 1.48 | 1.34 | 1.71           | 1.66 | 2.29 | 1.72 | 1.35 | 1.31 |
|                                                     | linoleoyl-linolenoyl-glycerol (18:2/18:3) [2]*        | 1.17        | 1.13 | 0.85 | 0.93     | 0.98 | 0.98 | 1.27           | 0.96 | 1.20 | 1.60 | 1.11 | 1.04 |
|                                                     | stearoyl-arachidonoyl-glycerol (18:0/20:4) [1]*       | 0.78        | 1.02 | 0.75 | 0.90     | 1.18 | 0.79 | 1.28           | 1.32 | 1.21 | 1.12 | 1.14 | 1.15 |
|                                                     | stearoyl-arachidonoyl-glycerol (18:0/20:4) [2]*       | 0.81        | 1.03 | 0.96 | 0.98     | 1.21 | 1.06 | 1.31           | 1.20 | 1.15 | 1.09 | 1.03 | 1.04 |
|                                                     | oleoyl-arachidonoyl-glycerol (18:1/20:4) [1]*         | 0.87        | 0.91 | 0.44 | 0.54     | 0.64 | 0.73 | 0.48           | 0.94 | 0.72 | 0.78 | 1.32 | 0.43 |
|                                                     | oleoyl-arachidonoyl-glycerol (18:1/20:4) [2]*         | 0.79        | 0.94 | 0.62 | 0.72     | 0.97 | 0.81 | 1.01           | 0.90 | 1.09 | 1.10 | 0.87 | 0.84 |
|                                                     | linoleoyl-arachidonoyl-glycerol (18:2/20:4) [1]*      | 0.99        | 0.85 | 0.68 | 1.15     | 0.65 | 0.94 | 0.89           | 0.64 | 1.10 | 0.76 | 0.83 | 0.80 |
| linoleoyl-arachidonoyl-glycerol (18:2/20:4) [2]*    | 0.82                                                  | 0.91        | 0.71 | 1.11 | 1.39     | 1.14 | 1.49 | 1.37           | 1.46 | 1.10 | 0.90 | 0.92 |      |
| stearoyl-docosahexaenoyl-glycerol (18:0/22:6) [2]*  | 0.71                                                  | 1.06        | 0.94 | 1.20 | 1.15     | 0.89 | 2.23 | 1.51           | 1.41 | 1.31 | 1.40 | 1.49 |      |
| linoleoyl-docosahexaenoyl-glycerol (18:2/22:6) [2]* | 0.84                                                  | 0.76        | 0.78 | 1.43 | 1.29     | 1.12 | 1.47 | 1.20           | 1.12 | 0.86 | 0.70 | 0.78 |      |



**Supplementary Table 5.** CerS6 KO resulted in significantly reduced levels of long chain fatty acids in male mice with only few changes in female mice. Both WT and KO females have significantly higher levels of multiple long-chain and polyunsaturated fatty acids on FD and CTRL diets.

|                                        |                                            | Fold Change |      |      |          |      |      |                |      |      |      |      |      |
|----------------------------------------|--------------------------------------------|-------------|------|------|----------|------|------|----------------|------|------|------|------|------|
|                                        |                                            | Female      |      |      | Male     |      |      | Female<br>Male |      |      |      |      |      |
|                                        |                                            | KO<br>WT    |      |      | KO<br>WT |      |      | WT             |      |      | KO   |      |      |
| Sub Pathway                            | Biochemical Name                           | CTRL        | FD   | FS   | CTRL     | FD   | FS   | CTRL           | FD   | FS   | CTRL | FD   | FS   |
| Long Chain Fatty Acid                  | myristate (14:0)                           | 0.88        | 1.04 | 0.93 | 0.65     | 0.71 | 0.61 | 1.46           | 1.39 | 0.94 | 1.98 | 2.05 | 1.42 |
|                                        | myristoleate (14:1n5)                      | 0.95        | 0.98 | 0.68 | 0.89     | 0.94 | 0.63 | 1.14           | 1.26 | 0.95 | 1.22 | 1.31 | 1.02 |
|                                        | palmitate (16:0)                           | 0.93        | 0.99 | 0.94 | 0.77     | 0.75 | 0.78 | 1.36           | 1.28 | 0.99 | 1.65 | 1.68 | 1.20 |
|                                        | palmitoleate (16:1n7)                      | 0.76        | 1.07 | 0.78 | 0.44     | 0.56 | 0.47 | 1.19           | 1.07 | 0.74 | 2.08 | 2.02 | 1.24 |
|                                        | margarate (17:0)                           | 0.97        | 1.09 | 0.97 | 0.99     | 0.82 | 0.81 | 1.59           | 1.45 | 1.10 | 1.56 | 1.94 | 1.32 |
|                                        | 10-heptadecenoate (17:1n7)                 | 0.78        | 1.13 | 0.93 | 0.64     | 0.65 | 0.68 | 1.49           | 1.27 | 1.00 | 1.81 | 2.22 | 1.36 |
|                                        | stearate (18:0)                            | 0.95        | 0.97 | 1.05 | 1.00     | 0.86 | 0.91 | 1.46           | 1.27 | 1.01 | 1.33 | 1.42 | 1.16 |
|                                        | oleate/vaccenate (18:1)                    | 0.91        | 1.01 | 0.87 | 0.57     | 0.66 | 0.68 | 1.41           | 1.43 | 1.09 | 2.27 | 2.18 | 1.38 |
|                                        | 10-nonadecenoate (19:1n9)                  | 0.90        | 1.19 | 0.88 | 0.63     | 0.66 | 0.79 | 1.15           | 1.06 | 1.04 | 1.65 | 1.90 | 1.16 |
|                                        | arachidate (20:0)                          | 0.98        | 1.05 | 1.13 | 0.78     | 0.69 | 0.98 | 0.40           | 0.36 | 0.37 | 0.50 | 0.54 | 0.43 |
|                                        | eicosenoate (20:1)                         | 0.82        | 1.14 | 0.72 | 0.45     | 0.55 | 0.73 | 0.66           | 0.58 | 0.67 | 1.19 | 1.22 | 0.66 |
|                                        | erucate (22:1n9)                           | 0.92        | 1.11 | 1.04 | 0.57     | 0.69 | 1.05 | 0.17           | 0.20 | 0.19 | 0.27 | 0.32 | 0.18 |
|                                        | nervonate (24:1n9)*                        | 0.92        | 1.05 | 1.19 | 0.96     | 0.86 | 1.10 | 0.97           | 0.97 | 0.76 | 0.94 | 1.18 | 0.82 |
| Polyunsaturated Fatty Acid (n3 and n6) | heneicosapentaenoate (21:5n3)              | 1.27        | 1.04 | 1.30 | 0.91     | 0.58 | 0.75 | 1.54           | 1.23 | 0.54 | 2.16 | 2.20 | 0.94 |
|                                        | hexadecadienoate (16:2n6)                  | 0.94        | 0.83 | 0.65 | 0.97     | 0.90 | 0.87 | 1.62           | 1.49 | 1.10 | 1.57 | 1.38 | 0.83 |
|                                        | stearidonate (18:4n3)                      | 0.99        | 0.90 | 0.78 | 1.32     | 1.08 | 0.90 | 2.32           | 2.16 | 1.15 | 1.75 | 1.80 | 1.00 |
|                                        | eicosapentaenoate (EPA; 20:5n3)            | 0.75        | 0.83 | 0.99 | 1.12     | 0.84 | 0.77 | 1.61           | 1.20 | 0.65 | 1.08 | 1.18 | 0.85 |
|                                        | docosapentaenoate (n3 DPA; 22:5n3)         | 0.80        | 0.81 | 0.99 | 1.25     | 0.88 | 0.92 | 1.51           | 1.13 | 0.60 | 0.97 | 1.04 | 0.65 |
|                                        | docosahexaenoate (DHA; 22:6n3)             | 0.77        | 0.88 | 1.09 | 1.02     | 0.86 | 0.87 | 1.69           | 1.44 | 0.79 | 1.27 | 1.47 | 0.98 |
|                                        | nisinate (24:6n3)                          | 0.80        | 0.66 | 0.99 | 0.78     | 0.81 | 1.15 | 0.87           | 0.87 | 0.64 | 0.90 | 0.71 | 0.55 |
|                                        | linoleate (18:2n6)                         | 0.96        | 0.93 | 0.98 | 0.89     | 0.83 | 0.93 | 1.72           | 1.61 | 1.09 | 1.66 | 1.80 | 1.14 |
|                                        | linolenate [alpha or gamma; (18:3n3 or 6)] | 0.92        | 0.96 | 0.90 | 0.80     | 0.74 | 0.80 | 2.20           | 1.76 | 1.06 | 2.54 | 2.27 | 1.20 |
|                                        | dihomo-linolenate (20:3n3 or n6)           | 0.81        | 0.79 | 0.95 | 0.82     | 0.75 | 0.96 | 1.13           | 1.04 | 0.81 | 1.11 | 1.10 | 0.79 |
|                                        | arachidonate (20:4n6)                      | 0.78        | 0.88 | 1.19 | 0.93     | 0.85 | 0.93 | 1.20           | 1.04 | 0.65 | 1.00 | 1.07 | 0.84 |
|                                        | adrenate (22:4n6)                          | 0.78        | 0.86 | 0.83 | 0.99     | 0.88 | 1.21 | 1.65           | 1.42 | 1.06 | 1.30 | 1.38 | 0.73 |
|                                        | docosapentaenoate (n6 DPA; 22:5n6)         | 0.55        | 0.69 | 1.09 | 0.90     | 0.75 | 1.08 | 1.29           | 0.92 | 0.77 | 0.79 | 0.84 | 0.78 |
|                                        | docosadienoate (22:2n6)                    | 0.84        | 0.90 | 0.97 | 0.74     | 0.66 | 1.31 | 0.45           | 0.39 | 0.43 | 0.51 | 0.53 | 0.32 |
|                                        | dihomo-linoleate (20:2n6)                  | 0.87        | 0.89 | 0.81 | 0.63     | 0.67 | 0.87 | 1.17           | 1.07 | 1.03 | 1.63 | 1.41 | 0.96 |

**Supplementary Table 6.** Phosphatidylcholines show few differences between KO and WT livers of both sexes independent of diet. Several phosphatidylcholine species are significantly higher in females than males.

| Sub Pathway                                   | Biochemical Name                                        | Fold Change |      |      |      |      |      |        |      |      |      |      |      |
|-----------------------------------------------|---------------------------------------------------------|-------------|------|------|------|------|------|--------|------|------|------|------|------|
|                                               |                                                         | Female      |      |      | Male |      |      | Female |      |      |      |      |      |
|                                               |                                                         | KO          |      |      | KO   |      |      | WT     |      |      | KO   |      |      |
|                                               |                                                         | CTRL        | FD   | FS   | CTRL | FD   | FS   | CTRL   | FD   | FS   | CTRL | FD   | FS   |
| Phosphatidylcholine (PC)                      | 1-myristoyl-2-palmitoyl-GPC (14:0/16:0)                 | 1.18        | 1.12 | 1.18 | 0.95 | 1.12 | 0.97 | 1.11   | 1.25 | 1.23 | 1.38 | 1.25 | 1.51 |
|                                               | 1-myristoyl-2-arachidonoyl-GPC (14:0/20:4)*             | 0.84        | 0.88 | 1.05 | 0.79 | 0.93 | 0.81 | 0.95   | 1.01 | 0.95 | 1.01 | 0.95 | 1.24 |
|                                               | 1,2-dipalmitoyl-GPC (16:0/16:0)                         | 1.00        | 0.95 | 1.05 | 0.94 | 1.05 | 0.97 | 1.34   | 1.38 | 1.28 | 1.41 | 1.25 | 1.39 |
|                                               | 1-palmitoyl-2-palmitoleoyl-GPC (16:0/16:1)*             | 1.06        | 1.14 | 1.15 | 0.91 | 1.07 | 0.94 | 0.53   | 0.61 | 0.61 | 0.61 | 0.65 | 0.75 |
|                                               | 1-palmitoyl-2-stearoyl-GPC (16:0/18:0)                  | 0.85        | 0.90 | 0.95 | 0.94 | 1.07 | 0.94 | 1.71   | 1.61 | 1.58 | 1.56 | 1.36 | 1.59 |
|                                               | 1-palmitoyl-2-oleoyl-GPC (16:0/18:1)                    | 1.03        | 1.08 | 1.07 | 0.95 | 1.06 | 0.96 | 0.80   | 0.90 | 0.88 | 0.87 | 0.91 | 0.98 |
|                                               | 1-palmitoyl-2-linoleoyl-GPC (16:0/18:2)                 | 1.12        | 0.99 | 1.16 | 1.15 | 1.10 | 1.10 | 0.84   | 0.90 | 0.88 | 0.82 | 0.81 | 0.87 |
|                                               | 1-palmitoyl-2-gamma-linolenoyl-GPC (16:0/18:3n6)*       | 0.95        | 0.87 | 0.97 | 1.67 | 1.27 | 1.26 | 0.88   | 0.92 | 0.85 | 0.50 | 0.64 | 0.66 |
|                                               | 1-palmitoyl-2-dihomo-linolenoyl-GPC (16:0/20:3n3 or 6)* | 1.10        | 1.04 | 1.13 | 0.91 | 0.91 | 0.94 | 0.68   | 0.70 | 0.77 | 0.82 | 0.81 | 0.93 |
|                                               | 1-palmitoyl-2-arachidonoyl-GPC (16:0/20:4n6)            | 0.96        | 0.91 | 0.98 | 0.98 | 0.98 | 0.90 | 1.07   | 1.10 | 0.97 | 1.04 | 1.03 | 1.06 |
|                                               | 1-palmitoyl-2-docosahexaenoyl-GPC (16:0/22:6)           | 1.00        | 0.97 | 1.01 | 0.96 | 0.99 | 0.92 | 1.15   | 1.18 | 1.08 | 1.20 | 1.16 | 1.18 |
|                                               | 1-palmitoleoyl-2-linoleoyl-GPC (16:1/18:2)*             | 1.03        | 1.06 | 1.05 | 1.00 | 1.10 | 1.01 | 0.71   | 0.76 | 0.77 | 0.73 | 0.73 | 0.80 |
|                                               | 1-palmitoleoyl-2-linolenoyl-GPC (16:1/18:3)*            | 0.92        | 0.94 | 1.10 | 1.19 | 1.24 | 1.06 | 0.62   | 0.70 | 0.68 | 0.48 | 0.53 | 0.71 |
|                                               | 1-stearoyl-2-oleoyl-GPC (18:0/18:1)                     | 0.88        | 0.98 | 0.92 | 0.92 | 0.97 | 0.83 | 1.11   | 1.22 | 1.24 | 1.05 | 1.24 | 1.37 |
|                                               | 1-stearoyl-2-linoleoyl-GPC (18:0/18:2)*                 | 0.98        | 0.89 | 0.98 | 1.03 | 0.98 | 1.05 | 1.11   | 1.18 | 1.21 | 1.06 | 1.08 | 1.13 |
|                                               | 1-stearoyl-2-arachidonoyl-GPC (18:0/20:4)               | 0.84        | 0.89 | 0.91 | 0.93 | 0.92 | 0.80 | 1.43   | 1.45 | 1.21 | 1.30 | 1.41 | 1.38 |
|                                               | 1-stearoyl-2-docosahexaenoyl-GPC (18:0/22:6)            | 0.92        | 0.94 | 0.93 | 1.03 | 0.94 | 0.84 | 1.79   | 1.71 | 1.52 | 1.60 | 1.72 | 1.69 |
|                                               | 1,2-dioleoyl-GPC (18:1/18:1)                            | 0.81        | 1.08 | 0.94 | 0.64 | 0.88 | 0.79 | 0.74   | 0.80 | 0.93 | 0.93 | 0.97 | 1.10 |
|                                               | 1-oleoyl-2-linoleoyl-GPC (18:1/18:2)*                   | 0.94        | 1.02 | 0.95 | 0.66 | 0.96 | 0.96 | 0.72   | 0.90 | 1.03 | 1.02 | 0.95 | 1.02 |
|                                               | 1-oleoyl-2-docosahexaenoyl-GPC (18:1/22:6)*             | 0.89        | 1.06 | 1.01 | 0.76 | 1.02 | 0.81 | 1.09   | 1.20 | 1.13 | 1.26 | 1.25 | 1.39 |
| 1,2-dilinoleoyl-GPC (18:2/18:2)               | 1.03                                                    | 0.97        | 1.10 | 1.07 | 0.98 | 1.21 | 0.75 | 0.70   | 0.90 | 0.73 | 0.69 | 0.82 |      |
| 1-linoleoyl-2-linolenoyl-GPC (18:2/18:3)*     | 1.17                                                    | 1.00        | 1.27 | 1.72 | 1.28 | 1.50 | 0.87 | 0.68   | 0.83 | 0.59 | 0.53 | 0.70 |      |
| 1-linoleoyl-2-arachidonoyl-GPC (18:2/20:4n6)* | 0.84                                                    | 0.91        | 0.98 | 0.90 | 0.95 | 0.97 | 0.94 | 0.86   | 0.97 | 0.88 | 0.82 | 0.98 |      |

**Supplementary Table 7.** The top metabolites (46) that were significantly different between male and female mice in untargeted metabolomics analysis belong to the amino acid, sugar and lipid metabolism. Metabolites are listed with sub-pathway to which they belong.

### Sex differences

p<0.01 487 metabolites

0.01<p<0.05 63 metabolites

| Sub Pathway                                      | Biochemical Name                                   | p-value   |
|--------------------------------------------------|----------------------------------------------------|-----------|
| Glutamate Metabolism                             | N-acetylglutamine                                  | 0.0000000 |
| Histidine Metabolism                             | 1-methylhistidine                                  | 0.0000000 |
| Histidine Metabolism                             | N-acetyl-1-methylhistidine*                        | 0.0000000 |
| Histidine Metabolism                             | imidazole lactate                                  | 0.0000000 |
| Histidine Metabolism                             | anserine                                           | 0.0000000 |
| Histidine Metabolism                             | 1-ribosyl-imidazoleacetate*                        | 0.0000000 |
| Histidine Metabolism                             | 4-imidazoleacetate                                 | 0.0000000 |
| Lysine Metabolism                                | N2-acetyllysine                                    | 0.0000000 |
| Leucine, Isoleucine and Valine Metabolism        | N-acetylleucine                                    | 0.0000000 |
| Leucine, Isoleucine and Valine Metabolism        | alpha-hydroxyisovalerate                           | 0.0000000 |
| Methionine, Cysteine, SAM and Taurine Metabolism | N-formylmethionine                                 | 0.0000000 |
| Methionine, Cysteine, SAM and Taurine Metabolism | hypotaurine                                        | 0.0000000 |
| Urea cycle; Arginine and Proline Metabolism      | homoarginine                                       | 0.0000000 |
| Urea cycle; Arginine and Proline Metabolism      | N-acetylarginine                                   | 0.0000000 |
| Urea cycle; Arginine and Proline Metabolism      | trans-4-hydroxyproline                             | 0.0000000 |
| Gamma-glutamyl Amino Acid                        | gamma-glutamylglycine                              | 0.0000000 |
| Gamma-glutamyl Amino Acid                        | gamma-glutamylisoleucine*                          | 0.0000000 |
| Gamma-glutamyl Amino Acid                        | gamma-glutamylleucine                              | 0.0000000 |
| Fructose, Mannose and Galactose Metabolism       | mannose                                            | 0.0000000 |
| Aminosugar Metabolism                            | N-acetylglucosaminylasparagine                     | 0.0000000 |
| Long Chain Fatty Acid                            | arachidate (20:0)                                  | 0.0000000 |
| Long Chain Fatty Acid                            | erucate (22:1n9)                                   | 0.0000000 |
| Polyunsaturated Fatty Acid (n3 and n6)           | docosadienoate (22:2n6)                            | 0.0000000 |
| Fatty Acid, Amino                                | 2-aminooctanoate                                   | 0.0000000 |
| Fatty Acid Metabolism(Acyl Carnitine)            | oleoylcarnitine (C18:1)                            | 0.0000000 |
| Fatty Acid Metabolism(Acyl Carnitine)            | pimeloylcarnitine/3-methyladipoylcarnitine (C7-DC) | 0.0000000 |
| Fatty Acid Metabolism(Acyl Carnitine)            | arachidonoylcarnitine (C20:4)                      | 0.0000000 |
| Fatty Acid Metabolism(Acyl Carnitine)            | behenoylcarnitine (C22)*                           | 0.0000000 |
| Fatty Acid Metabolism(Acyl Carnitine)            | lignoceroylcarnitine (C24)*                        | 0.0000000 |
| Fatty Acid Metabolism(Acyl Carnitine)            | nervonoylcarnitine (C24:1)*                        | 0.0000000 |
| Phospholipid Metabolism                          | trimethylamine N-oxide                             | 0.0000000 |
| Phosphatidylcholine (PC)                         | 1,2-dipalmitoyl-GPC (16:0/16:0)                    | 0.0000000 |
| Phosphatidylcholine (PC)                         | 1-palmitoyl-2-palmitoleoyl-GPC (16:0/16:1)*        | 0.0000000 |
| Phosphatidylcholine (PC)                         | 1-palmitoyl-2-stearoyl-GPC (16:0/18:0)             | 0.0000000 |
| Phosphatidylcholine (PC)                         | 1-palmitoleoyl-2-linoleoyl-GPC (16:1/18:2)*        | 0.0000000 |
| Phosphatidylcholine (PC)                         | 1-palmitoleoyl-2-linolenoyl-GPC (16:1/18:3)*       | 0.0000000 |
| Phosphatidylcholine (PC)                         | 1-stearoyl-2-arachidonoyl-GPC (18:0/20:4)          | 0.0000000 |
| Phosphatidylcholine (PC)                         | 1-stearoyl-2-docosahexaenoyl-GPC (18:0/22:6)       | 0.0000000 |
| Phosphatidylethanolamine (PE)                    | 1-palmitoyl-2-stearoyl-GPE (16:0/18:0)*            | 0.0000000 |
| Phosphatidylethanolamine (PE)                    | 1-palmitoyl-2-arachidonoyl-GPE (16:0/20:4)*        | 0.0000000 |
| Phosphatidylethanolamine (PE)                    | 1-oleoyl-2-linoleoyl-GPE (18:1/18:2)*              | 0.0000000 |
| Phosphatidylethanolamine (PE)                    | 1-linoleoyl-2-arachidonoyl-GPE (18:2/20:4)*        | 0.0000000 |
| Phosphatidylserine (PS)                          | 1-stearoyl-2-arachidonoyl-GPS (18:0/20:4)          | 0.0000000 |
| Phosphatidylinositol (PI)                        | 1-palmitoyl-2-linoleoyl-GPI (16:0/18:2)            | 0.0000000 |
| Lysophospholipid                                 | 1-palmitoleoyl-GPC (16:1)*                         | 0.0000000 |
| Lysoplasmalogen                                  | 1-(1-enyl-stearoyl)-GPE (P-18:0)*                  | 0.0000000 |

**Supplementary Table 8.** Fold-changes of the top 46 metabolites (from Supplementary Table 7) that were significantly different between male and female mice in untargeted metabolomics analysis.

| Biochemical Name                                   | Female/Male |       |       |         |       |      |
|----------------------------------------------------|-------------|-------|-------|---------|-------|------|
|                                                    | WT          |       |       | KO      |       |      |
|                                                    | CTRL/WT     | FD    | FS    | CTRL/KO | FD    | FS   |
| N-acetylglutamine                                  | 0.56        | 0.52  | 0.45  | 0.58    | 0.50  | 0.56 |
| 1-methylhistidine                                  | 0.63        | 0.51  | 0.55  | 0.61    | 0.49  | 0.55 |
| N-acetyl-1-methylhistidine*                        | 0.36        | 0.36  | 0.27  | 0.52    | 0.31  | 0.36 |
| imidazole lactate                                  | 0.16        | 0.13  | 0.18  | 0.17    | 0.12  | 0.15 |
| anserine                                           | 0.40        | 0.41  | 0.42  | 0.46    | 0.35  | 0.42 |
| 1-ribosyl-imidazoleacetate*                        | 0.15        | 0.21  | 0.32  | 0.23    | 0.38  | 0.24 |
| 4-imidazoleacetate                                 | 0.28        | 0.47  | 0.42  | 0.54    | 0.59  | 0.38 |
| N2-acetyllysine                                    | 0.27        | 0.54  | 0.21  | 0.29    | 0.25  | 0.28 |
| N-acetylleucine                                    | 0.61        | 0.53  | 0.35  | 0.29    | 0.46  | 0.37 |
| alpha-hydroxyisovalerate                           | 0.29        | 0.19  | 0.26  | 0.35    | 0.19  | 0.27 |
| N-formylmethionine                                 | 0.28        | 0.35  | 0.47  | 0.19    | 0.24  | 0.41 |
| hypotaurine                                        | 0.44        | 0.40  | 0.51  | 0.39    | 0.25  | 0.24 |
| homoarginine                                       | 2.59        | 2.76  | 2.28  | 2.05    | 2.18  | 1.59 |
| N-acetylarginine                                   | 0.28        | 0.23  | 0.28  | 0.24    | 0.18  | 0.24 |
| trans-4-hydroxyproline                             | 0.41        | 0.39  | 0.39  | 0.30    | 0.41  | 0.47 |
| gamma-glutamylglycine                              | 0.58        | 0.32  | 0.30  | 0.34    | 0.22  | 0.30 |
| gamma-glutamylisoleucine*                          | 0.71        | 0.57  | 0.68  | 0.59    | 0.48  | 0.56 |
| gamma-glutamylleucine                              | 0.57        | 0.50  | 0.66  | 0.50    | 0.40  | 0.52 |
| mannose                                            | 0.66        | 0.54  | 0.62  | 0.65    | 0.56  | 0.69 |
| N-acetylglucosaminylasparagine                     | 2.56        | 2.12  | 2.51  | 2.42    | 2.19  | 2.27 |
| arachidate (20:0)                                  | 0.40        | 0.36  | 0.37  | 0.50    | 0.54  | 0.43 |
| erucate (22:1n9)                                   | 0.17        | 0.20  | 0.19  | 0.27    | 0.32  | 0.18 |
| docosadienoate (22:2n6)                            | 0.45        | 0.39  | 0.43  | 0.51    | 0.53  | 0.32 |
| 2-aminooctanoate                                   | 0.48        | 0.38  | 0.37  | 0.36    | 0.36  | 0.39 |
| oleoylcarnitine (C18:1)                            | 2.01        | 2.80  | 2.26  | 1.74    | 2.36  | 2.04 |
| pimeloylcarnitine/3-methyladipoylcarnitine (C7-DC) | 0.45        | 0.36  | 0.40  | 0.22    | 0.16  | 0.21 |
| arachidonoylcarnitine (C20:4)                      | 2.43        | 2.81  | 1.67  | 3.21    | 2.86  | 2.30 |
| behenoylecarnitine (C22)*                          | 0.08        | 0.11  | 0.12  | 0.12    | 0.13  | 0.10 |
| lignoceroylcarnitine (C24)*                        | 0.46        | 0.66  | 0.55  | 0.34    | 0.46  | 0.44 |
| nervonoylcarnitine (C24:1)*                        | 0.17        | 0.22  | 0.21  | 0.21    | 0.22  | 0.14 |
| trimethylamine N-oxide                             | 20.24       | 21.64 | 13.01 | 18.10   | 18.58 | 9.35 |
| 1,2-dipalmitoyl-GPC (16:0/16:0)                    | 1.34        | 1.38  | 1.28  | 1.41    | 1.25  | 1.39 |
| 1-palmitoyl-2-palmitoleoyl-GPC (16:0/16:1)*        | 0.53        | 0.61  | 0.61  | 0.61    | 0.65  | 0.75 |
| 1-palmitoyl-2-stearoyl-GPC (16:0/18:0)             | 1.71        | 1.61  | 1.58  | 1.56    | 1.36  | 1.59 |
| 1-palmitoleoyl-2-linoleoyl-GPC (16:1/18:2)*        | 0.71        | 0.76  | 0.77  | 0.73    | 0.73  | 0.80 |
| 1-palmitoleoyl-2-linolenoyl-GPC (16:1/18:3)*       | 0.62        | 0.70  | 0.68  | 0.48    | 0.53  | 0.71 |
| 1-stearoyl-2-arachidonoyl-GPC (18:0/20:4)          | 1.43        | 1.45  | 1.21  | 1.30    | 1.41  | 1.38 |
| 1-stearoyl-2-docosahexaenoyl-GPC (18:0/22:6)       | 1.79        | 1.71  | 1.52  | 1.60    | 1.72  | 1.69 |
| 1-palmitoyl-2-stearoyl-GPE (16:0/18:0)*            | 3.32        | 2.86  | 2.04  | 3.33    | 2.27  | 4.44 |
| 1-palmitoyl-2-arachidonoyl-GPE (16:0/20:4)*        | 0.77        | 0.83  | 0.81  | 0.75    | 0.76  | 0.85 |
| 1-oleoyl-2-linoleoyl-GPE (18:1/18:2)*              | 0.52        | 0.65  | 0.68  | 0.49    | 0.57  | 0.69 |
| 1-linoleoyl-2-arachidonoyl-GPE (18:2/20:4)*        | 0.74        | 0.74  | 0.83  | 0.53    | 0.60  | 0.77 |
| 1-stearoyl-2-arachidonoyl-GPS (18:0/20:4)          | 1.36        | 1.54  | 1.41  | 1.26    | 1.32  | 1.41 |
| 1-palmitoyl-2-linoleoyl-GPI (16:0/18:2)            | 0.51        | 0.51  | 0.44  | 0.48    | 0.47  | 0.45 |
| 1-palmitoleoyl-GPC (16:1)*                         | 0.46        | 0.52  | 0.57  | 0.60    | 0.56  | 0.70 |
| 1-(1-enyl-stearoyl)-GPE (P-18:0)*                  | 1.75        | 2.21  | 1.85  | 1.66    | 1.64  | 1.87 |

**Supplementary Table 9.** The top 46 metabolites exhibiting significant differences between genotypes belonged to the lipid super family, including sphingolipids, phosphatidylethanolamines, and diacylglycerol species. Metabolites are listed with sub-pathway to which they belong.

### Genotype differences

p<0.01 173 metabolites

0.01<p<0.05 100 metabolites

| Sub Pathway                          | Biochemical Name                                       | p-value   |
|--------------------------------------|--------------------------------------------------------|-----------|
| Sphingolipid Metabolism              | palmitoyl sphingomyelin (d18:1/16:0)                   | 0.0000000 |
| Sphingolipid Metabolism              | sphingomyelin (d18:1/14:0, d16:1/16:0)*                | 0.0000000 |
| Sphingolipid Metabolism              | sphingomyelin (d17:1/16:0, d18:1/15:0, d16:1/17:0)*    | 0.0000000 |
| Sphingolipid Metabolism              | sphingomyelin (d18:2/16:0, d18:1/16:1)*                | 0.0000000 |
| Ceramides                            | N-palmitoyl-sphingosine (d18:1/16:0)                   | 0.0000000 |
| Ceramides                            | ceramide (d18:1/14:0, d16:1/16:0)*                     | 0.0000000 |
| Ceramides                            | N-palmitoyl-sphingadienine (d18:2/16:0)*               | 0.0000000 |
| Ceramides                            | N-palmitoyl-heptadecasphingosine (d17:1/16:0)*         | 0.0000000 |
| Hexosylceramides (HCER)              | glycosyl-N-palmitoyl-sphingosine (d18:1/16:0)          | 0.0000000 |
| Sphingolipid Metabolism              | heptadecasphingosine (d17:1)                           | 0.0000000 |
| Ceramides                            | N-(2-hydroxypalmitoyl)-sphingosine (d18:1/16:0(2OH))   | 0.0000000 |
| Phosphatidylethanolamine (PE)        | 1-oleoyl-2-linoleoyl-GPE (18:1/18:2)*                  | 0.0000000 |
| Phosphatidylethanolamine (PE)        | 1-palmitoyl-2-linoleoyl-GPE (16:0/18:2)                | 0.0000000 |
| Sphingolipid Metabolism              | tricosanoyl sphingomyelin (d18:1/23:0)*                | 0.0000000 |
| Phosphatidylethanolamine (PE)        | 1,2-dilinoleoyl-GPE (18:2/18:2)*                       | 0.0000000 |
| Dihydroceramides                     | N-palmitoyl-sphinganine (d18:0/16:0)                   | 0.0000000 |
| Phosphatidylethanolamine (PE)        | 1-palmitoyl-2-oleoyl-GPE (16:0/18:1)                   | 0.0000000 |
| Phosphatidylethanolamine (PE)        | 1-stearoyl-2-linoleoyl-GPE (18:0/18:2)*                | 0.0000000 |
| Lactosylceramides (LCER)             | lactosyl-N-palmitoyl-sphingosine (d18:1/16:0)          | 0.0000000 |
| Sphingolipid Metabolism              | hexadecasphingosine (d16:1)*                           | 0.0000000 |
| Sphingolipid Metabolism              | sphingomyelin (d18:0/20:0, d16:0/22:0)*                | 0.0000000 |
| Phosphatidylcholine (PC)             | 1-stearoyl-2-arachidonoyl-GPC (18:0/20:4)              | 0.0000000 |
| Phosphatidylethanolamine (PE)        | 1-linoleoyl-2-arachidonoyl-GPE (18:2/20:4)*            | 0.0000000 |
| Phosphatidylethanolamine (PE)        | 1-palmitoyl-2-arachidonoyl-GPE (16:0/20:4)*            | 0.0000000 |
| Fatty Acid Metabolism (Acyl Choline) | palmitoleylcholine                                     | 0.0000001 |
| Sphingolipid Metabolism              | behenoyl sphingomyelin (d18:1/22:0)*                   | 0.0000001 |
| Phosphatidylethanolamine (PE)        | 1-stearoyl-2-oleoyl-GPE (18:0/18:1)                    | 0.0000001 |
| Sphingolipid Metabolism              | lignoceroyl sphingomyelin (d18:1/24:0)                 | 0.0000001 |
| Fatty Acid Metabolism (Acyl Choline) | linoleoylcholine*                                      | 0.0000001 |
| Sphingolipid Metabolism              | sphingomyelin (d18:1/24:1, d18:2/24:0)*                | 0.0000001 |
| Phosphatidylethanolamine (PE)        | 1,2-dipalmitoyl-GPE (16:0/16:0)*                       | 0.0000002 |
| Diacylglycerol                       | oleoyl-oleoyl-glycerol (18:1/18:1) [2]*                | 0.0000004 |
| Phosphatidylinositol (PI)            | 1-palmitoyl-2-arachidonoyl-GPI (16:0/20:4)*            | 0.0000007 |
| Diacylglycerol                       | oleoyl-arachidonoyl-glycerol (18:1/20:4) [2]*          | 0.0000007 |
| Sphingolipid Metabolism              | behenoyl dihydrosphingomyelin (d18:0/22:0)*            | 0.0000011 |
| Diacylglycerol                       | palmitoyl-oleoyl-glycerol (16:0/18:1) [2]*             | 0.0000014 |
| Diacylglycerol                       | diacylglycerol (12:0/18:1, 14:0/16:1, 16:0/14:1) [2]*  | 0.0000016 |
| Fatty Acid Metabolism (Acyl Choline) | oleoylcholine                                          | 0.0000017 |
| Phosphatidylcholine (PC)             | 1-palmitoyl-2-linoleoyl-GPC (16:0/18:2)                | 0.0000035 |
| Ceramides                            | ceramide (d18:1/17:0, d17:1/18:0)*                     | 0.0000035 |
| Chemical                             | S-(3-hydroxypropyl)mercapturic acid (HPMA)             | 0.0000036 |
| Diacylglycerol                       | oleoyl-oleoyl-glycerol (18:1/18:1) [1]*                | 0.0000038 |
| Sphingolipid Metabolism              | sphingomyelin (d18:0/18:0, d19:0/17:0)*                | 0.0000038 |
| Sphingolipid Metabolism              | sphingomyelin (d18:2/24:1, d18:1/24:2)*                | 0.0000046 |
| Plasmalogen                          | 1-(1-enyl-palmitoyl)-2-arachidonoyl-GPE (P-16:0/20:4)* | 0.0000057 |
| Hexosylceramides (HCER)              | glycosyl-N-erucoyl-sphingosine (d18:1/22:1)*           | 0.0000065 |

**Supplementary Table 10.** The top 46 metabolites exhibiting the most significant difference between dietary groups belonged to several metabolic pathways including amino acid metabolism and TCA cycle intermediates. Metabolites are listed with sub-pathway to which they belong.

### Diet differences

p<0.01 167 metabolites

0.01<p<0.05 131 metabolites

| Sub Pathway                                      | Biochemical Name                                    | p-value   |
|--------------------------------------------------|-----------------------------------------------------|-----------|
| Folate Metabolism                                | folate                                              | 0.0000000 |
| Folate Metabolism                                | 7,8-dihydrofolate                                   | 0.0000000 |
| Pterin Metabolism                                | pterin                                              | 0.0000000 |
| Phenylalanine Metabolism                         | N-acetylphenylalanine                               | 0.0000000 |
| Gamma-glutamyl Amino Acid                        | gamma-glutamylglutamate                             | 0.0000000 |
| Glutathione Metabolism                           | 5-oxoproline                                        | 0.0000000 |
| Methionine, Cysteine, SAM and Taurine Metabolism | N-acetyltaurine                                     | 0.0000000 |
| Histidine Metabolism                             | formiminoglutamate                                  | 0.0000001 |
| Partially Characterized Molecules                | glycine conjugate of C10H14O2 (1)*                  | 0.0000008 |
| Urea cycle; Arginine and Proline Metabolism      | trans-4-hydroxyproline                              | 0.0000017 |
| Folate Metabolism                                | 5-methyltetrahydrofolate (5MeTHF)                   | 0.0000025 |
| Riboflavin Metabolism                            | flavin adenine dinucleotide (FAD)                   | 0.0000063 |
| Glutamate Metabolism                             | N-acetylglutamate                                   | 0.0000103 |
| Aminosugar Metabolism                            | glucuronate                                         | 0.0000121 |
| Riboflavin Metabolism                            | riboflavin (Vitamin B2)                             | 0.0000150 |
| Lysophospholipid                                 | 1-stearoyl-GPE (18:0)                               | 0.0000152 |
| Fructose, Mannose and Galactose Metabolism       | galactose 1-phosphate                               | 0.0000157 |
| Glutamate Metabolism                             | 4-hydroxyglutamate                                  | 0.0000218 |
| Eicosanoid                                       | 12-HHTrE                                            | 0.0000236 |
| Hexosylceramides (HCER)                          | glycosyl-N-arachidoyl-sphingosine (d18:1/20:0)*     | 0.0000275 |
| Pyrimidine Metabolism, Uracil containing         | uridine                                             | 0.0000278 |
| Methionine, Cysteine, SAM and Taurine Metabolism | N-acetylmethionine                                  | 0.0000398 |
| Lysophospholipid                                 | 1-palmitoyl-GPE (16:0)                              | 0.0000484 |
| Phospholipid Metabolism                          | glycerophosphoserine*                               | 0.0000547 |
| Polyamine Metabolism                             | N-acetylputrescine                                  | 0.0000693 |
| Fatty Acid Metabolism (Acyl Choline)             | palmitoylecholine                                   | 0.0000695 |
| Urea cycle; Arginine and Proline Metabolism      | homoarginine                                        | 0.0000790 |
| Gamma-glutamyl Amino Acid                        | gamma-glutamylglutamine                             | 0.0000793 |
| Fatty Acid Metabolism(Acyl Carnitine)            | 3-hydroxybutyrylcarnitine (1)                       | 0.0000855 |
| Glutamate Metabolism                             | glutamate                                           | 0.0001000 |
| Lysine Metabolism                                | N6,N6,N6-trimethyllysine                            | 0.0001000 |
| Glutathione Metabolism                           | glutathione, oxidized (GSSG)                        | 0.0001000 |
| Purine Metabolism, Guanine containing            | 7-methylguanine                                     | 0.0001000 |
| Lysine Metabolism                                | lysine                                              | 0.0002000 |
| TCA Cycle                                        | isocitrate                                          | 0.0002000 |
| Fatty Acid, Dihydroxy                            | 14,15-DiHETrE                                       | 0.0002000 |
| Sphingolipid Metabolism                          | sphingomyelin (d18:1/22:2, d18:2/22:1, d16:1/24:2)* | 0.0002000 |
| Secondary Bile Acid Metabolism                   | tauroolithocholate                                  | 0.0002000 |
| Secondary Bile Acid Metabolism                   | taurohyodeoxycholic acid                            | 0.0002000 |
| Riboflavin Metabolism                            | flavin mononucleotide (FMN)                         | 0.0002000 |
| Chemical                                         | S-(3-hydroxypropyl)mercapturic acid (HPMA)          | 0.0002000 |
| Glycine, Serine and Threonine Metabolism         | betaine                                             | 0.0003000 |
| Glycogen Metabolism                              | maltopentaose                                       | 0.0003000 |
| Sphingolipid Metabolism                          | sphingomyelin (d18:1/14:0, d16:1/16:0)*             | 0.0003000 |
| Vitamin A Metabolism                             | retinol (Vitamin A)                                 | 0.0003000 |
| Vitamin B6 Metabolism                            | pyridoxal phosphate                                 | 0.0003000 |

**Supplementary Table 11.** Top 46 metabolites exhibiting the most significant genotype:sex interactions. Metabolites are listed with sub-pathway to which they belong.

### Genotype:Sex interaction

p<0.01 73 metabolites

0.01<p<0.05 70 metabolites

| Sub Pathway                                          | Biochemical Name                                        | p-value   |
|------------------------------------------------------|---------------------------------------------------------|-----------|
| Ceramides                                            | N-palmitoyl-sphingosine (d18:1/16:0)                    | 0.0000000 |
| Sphingolipid Metabolism                              | palmitoyl sphingomyelin (d18:1/16:0)                    | 0.0000001 |
| Chemical                                             | S-(3-hydroxypropyl)mercapturic acid (HPMA)              | 0.0000036 |
| Sphingolipid Metabolism                              | sphingomyelin (d18:1/22:2, d18:2/22:1, d16:1/24:2)*     | 0.0000072 |
| Phosphatidylcholine (PC)                             | 1-palmitoyl-2-gamma-linolenoyl-GPC (16:0/18:3n6)*       | 0.0000106 |
| Hexosylceramides (HCER)                              | glycosyl-N-palmitoyl-sphingosine (d18:1/16:0)           | 0.0000136 |
| Diacylglycerol                                       | diacylglycerol (12:0/18:1, 14:0/16:1, 16:0/14:1) [1]*   | 0.0000142 |
| Ceramides                                            | N-palmitoyl-sphingadienine (d18:2/16:0)*                | 0.0000143 |
| Dihydroceramides                                     | N-palmitoyl-sphinganine (d18:0/16:0)                    | 0.0000180 |
| Diacylglycerol                                       | diacylglycerol (14:0/18:1, 16:0/16:1) [2]*              | 0.0000608 |
| Sphingolipid Metabolism                              | sphingomyelin (d18:1/14:0, d16:1/16:0)*                 | 0.0000614 |
| Diacylglycerol                                       | diacylglycerol (14:0/18:1, 16:0/16:1) [1]*              | 0.0000652 |
| Sphingolipid Metabolism                              | sphingomyelin (d18:1/20:1, d18:2/20:0)*                 | 0.0000768 |
| TCA Cycle                                            | succinylcarnitine (C4-DC)                               | 0.0001000 |
| Diacylglycerol                                       | diacylglycerol (12:0/18:1, 14:0/16:1, 16:0/14:1) [2]*   | 0.0001000 |
| Diacylglycerol                                       | palmitoyl-myristoyl-glycerol (16:0/14:0) [2]            | 0.0001000 |
| Diacylglycerol                                       | palmitoyl-oleoyl-glycerol (16:0/18:1) [2]*              | 0.0001000 |
| Sphingolipid Metabolism                              | sphingomyelin (d18:1/21:0, d17:1/22:0, d16:1/23:0)*     | 0.0001000 |
| Diacylglycerol                                       | palmitoyl-myristoyl-glycerol (16:0/14:0) [1]*           | 0.0002000 |
| Diacylglycerol                                       | palmitoyl-oleoyl-glycerol (16:0/18:1) [1]*              | 0.0002000 |
| Diacylglycerol                                       | oleoyl-oleoyl-glycerol (18:1/18:1) [2]*                 | 0.0003000 |
| Phosphatidylethanolamine (PE)                        | 1,2-dilinoleoyl-GPE (18:2/18:2)*                        | 0.0004000 |
| Diacylglycerol                                       | palmitoleoyl-oleoyl-glycerol (16:1/18:1) [2]*           | 0.0004000 |
| Long Chain Fatty Acid                                | oleate/vaccenate (18:1)                                 | 0.0005000 |
| Purine Metabolism, Guanine containing                | guanosine                                               | 0.0005000 |
| Pentose Metabolism                                   | ribulose/xylulose                                       | 0.0006000 |
| Phosphatidylethanolamine (PE)                        | 1-linoleoyl-2-arachidonoyl-GPE (18:2/20:4)*             | 0.0006000 |
| Sphingolipid Metabolism                              | sphingomyelin (d18:1/19:0, d19:1/18:0)*                 | 0.0007000 |
| Pyrimidine Metabolism, Thymine containing            | 3-aminoisobutyrate                                      | 0.0010000 |
| Glutathione Metabolism                               | ophthalmate                                             | 0.0012000 |
| Long Chain Fatty Acid                                | palmitoleate (16:1n7)                                   | 0.0013000 |
| Guanidino and Acetamido Metabolism                   | guanidinosuccinate                                      | 0.0014000 |
| Phosphatidylcholine (PC)                             | 1-myristoyl-2-palmitoyl-GPC (14:0/16:0)                 | 0.0015000 |
| Chemical                                             | O-sulfo-L-tyrosine                                      | 0.0016000 |
| Glycolysis, Gluconeogenesis, and Pyruvate Metabolism | pyruvate                                                | 0.0017000 |
| Fructose, Mannose and Galactose Metabolism           | galactonate                                             | 0.0018000 |
| Fatty Acid, Monohydroxy                              | 16-hydroxypalmitate                                     | 0.0018000 |
| Plasmalogen                                          | 1-(1-enyl-palmitoyl)-2-oleoyl-GPE (P-16:0/18:1)*        | 0.0019000 |
| Sterol                                               | 4-cholesten-3-one                                       | 0.0023000 |
| Diacylglycerol                                       | diacylglycerol (16:1/18:2 [2], 16:0/18:3 [1])*          | 0.0024000 |
| Phosphatidylcholine (PC)                             | 1-palmitoyl-2-dihomo-linolenoyl-GPC (16:0/20:3n3 or 6)* | 0.0026000 |
| Long Chain Fatty Acid                                | myristate (14:0)                                        | 0.0033000 |
| Diacylglycerol                                       | linoleoyl-docosahexaenoyl-glycerol (18:2/22:6) [2]*     | 0.0034000 |
| Ceramides                                            | ceramide (d18:1/14:0, d16:1/16:0)*                      | 0.0034000 |
| Diacylglycerol                                       | oleoyl-oleoyl-glycerol (18:1/18:1) [1]*                 | 0.0035000 |
| Long Chain Fatty Acid                                | eicosenoate (20:1)                                      | 0.0038000 |

**Supplementary Table 12.** Top 46 metabolites exhibiting the most significant sex: diet interactions.

Metabolites are listed with sub-pathway to which they belong.

### Sex:diet interaction

p<0.01 45 metabolites

0.01<p<0.05 67 metabolites

| Sub-pathway                                          | Metabolite                                           | p-value |
|------------------------------------------------------|------------------------------------------------------|---------|
| Fatty Acid, Monohydroxy                              | 3-hydroxylaurate                                     | 0.0001  |
| Chemical                                             | S-(3-hydroxypropyl)mercapturic acid (HPMA)           | 0.0002  |
| Polyunsaturated Fatty Acid (n3 and n6)               | docosahexaenoate (DHA; 22:6n3)                       | 0.0003  |
| Glycolysis, Gluconeogenesis, and Pyruvate Metabolism | dihydroxyacetone phosphate (DHAP)                    | 0.0005  |
| Phosphatidylethanolamine (PE)                        | 1-stearoyl-2-oleoyl-GPE (18:0/18:1)                  | 0.0006  |
| Methionine, Cysteine, SAM and Taurine Metabolism     | N-acetyltaurine                                      | 0.0008  |
| Polyunsaturated Fatty Acid (n3 and n6)               | linoleate (18:2n6)                                   | 0.0008  |
| Polyunsaturated Fatty Acid (n3 and n6)               | linolenate [alpha or gamma; (18:3n3 or 6)]           | 0.0009  |
| Fatty Acid, Monohydroxy                              | 16-hydroxypalmitate                                  | 0.0009  |
| Sphingolipid Metabolism                              | sphingomyelin (d18:1/18:1, d18:2/18:0)               | 0.0012  |
| Polyunsaturated Fatty Acid (n3 and n6)               | docosapentaenoate (n3 DPA; 22:5n3)                   | 0.0013  |
| Polyunsaturated Fatty Acid (n3 and n6)               | arachidonate (20:4n6)                                | 0.0014  |
| Lysophospholipid                                     | 1-oleoyl-GPE (18:1)                                  | 0.0014  |
| Polyunsaturated Fatty Acid (n3 and n6)               | heneicosapentaenoate (21:5n3)                        | 0.0016  |
| Glycogen Metabolism                                  | maltopentaose                                        | 0.0018  |
| Pyrimidine Metabolism, Thymine containing            | thymine                                              | 0.0018  |
| Pantothenate and CoA Metabolism                      | 3'-dephosphocoenzyme A                               | 0.0023  |
| Phosphatidylethanolamine (PE)                        | 1-linoleoyl-2-arachidonoyl-GPE (18:2/20:4)*          | 0.0026  |
| Glutamate Metabolism                                 | glutamate, gamma-methyl ester                        | 0.0029  |
| Long Chain Fatty Acid                                | palmitate (16:0)                                     | 0.0029  |
| Phosphatidylcholine (PC)                             | 1,2-dilinoleoyl-GPC (18:2/18:2)                      | 0.0031  |
| Methionine, Cysteine, SAM and Taurine Metabolism     | N-formylmethionine                                   | 0.0033  |
| Lysophospholipid                                     | 1-arachidonoyl-GPI (20:4)*                           | 0.0033  |
| Lysine Metabolism                                    | N-trimethyl 5-aminovaleate                           | 0.0034  |
| Phosphatidylcholine (PC)                             | 1-linoleoyl-2-arachidonoyl-GPC (18:2/20:4n6)*        | 0.0035  |
| Ceramides                                            | N-(2-hydroxypalmitoyl)-sphingosine (d18:1/16:0(2OH)) | 0.0035  |
| Endocannabinoid                                      | N-oleoyltaurine                                      | 0.0036  |
| Lysophospholipid                                     | 1-palmitoyl-GPE (16:0)                               | 0.0036  |
| Fatty Acid Metabolism (also BCAA Metabolism)         | methylmalonate (MMA)                                 | 0.0039  |
| Pantothenate and CoA Metabolism                      | pantetheine                                          | 0.0039  |
| Secondary Bile Acid Metabolism                       | taurothiocholate                                     | 0.0044  |
| Long Chain Fatty Acid                                | stearate (18:0)                                      | 0.0045  |
| Glycogen Metabolism                                  | maltohexaose                                         | 0.0054  |
| Folate Metabolism                                    | 7,8-dihydrofolate                                    | 0.0054  |
| Lysophospholipid                                     | 1-arachidonoyl-GPE (20:4n6)*                         | 0.0057  |
| Long Chain Fatty Acid                                | oleate/vaccenate (18:1)                              | 0.0058  |
| Pentose Metabolism                                   | ribulose/xylulose                                    | 0.0061  |
| Glycogen Metabolism                                  | maltotetraose                                        | 0.0066  |
| Phosphatidylethanolamine (PE)                        | 1-oleoyl-2-linoleoyl-GPE (18:1/18:2)*                | 0.0066  |
| Glycolysis, Gluconeogenesis, and Pyruvate Metabolism | glucose                                              | 0.0067  |
| Glutathione Metabolism                               | cysteinylglycine                                     | 0.0070  |
| Polyunsaturated Fatty Acid (n3 and n6)               | dihomo-linolenate (20:3n3 or n6)                     | 0.0071  |
| Fructose, Mannose and Galactose Metabolism           | mannitol/sorbitol                                    | 0.0073  |
| Fatty Acid, Monohydroxy                              | 3-hydroxylaurate                                     | 0.0079  |
| Phosphatidylserine (PS)                              | 1-stearoyl-2-oleoyl-GPS (18:0/18:1)                  | 0.0101  |
| Vitamin B6 Metabolism                                | pyridoxamine                                         | 0.0101  |



**Supplementary Table 13.** Top 46 metabolites exhibiting the most significant genotype: diet interactions. Metabolites are listed with sub-pathway to which they belong.

### Genotype:Diet interaction

p<0.01 24 metabolites

0.01<p<0.05 62 metabolites

| Sub Pathway                                          | Biochemical Name                                      | p-value   |
|------------------------------------------------------|-------------------------------------------------------|-----------|
| Diacylglycerol                                       | palmitoyl-docosahexaenoyl-glycerol (16:0/22:6) [2]*   | 0.0000196 |
| Pentose Phosphate Pathway                            | ribose 1-phosphate                                    | 0.0010000 |
| Phosphatidylethanolamine (PE)                        | 1-palmitoyl-2-stearoyl-GPE (16:0/18:0)*               | 0.0014000 |
| Nucleotide Sugar                                     | cytidine 5'-monophospho-N-acetylneuraminic acid       | 0.0017000 |
| Diacylglycerol                                       | diacylglycerol (12:0/18:1, 14:0/16:1, 16:0/14:1) [1]* | 0.0023000 |
| Methionine, Cysteine, SAM and Taurine Metabolism     | hypotaurine                                           | 0.0032000 |
| Purine Metabolism, (Hypo)Xanthine/Inosine containing | inosine                                               | 0.0034000 |
| Sphingolipid Metabolism                              | lignoceroyl sphingomyelin (d18:1/24:0)                | 0.0037000 |
| Pyrimidine Metabolism, Cytidine containing           | 5-methylcytidine                                      | 0.0037000 |
| Diacylglycerol                                       | stearoyl-arachidonoyl-glycerol (18:0/20:4) [2]*       | 0.0049000 |
| Fatty Acid Metabolism (Acyl Choline)                 | palmitoleoylcholine                                   | 0.0050000 |
| Histidine Metabolism                                 | imidazole lactate                                     | 0.0058000 |
| Diacylglycerol                                       | oleoyl-oleoyl-glycerol (18:1/18:1) [1]*               | 0.0061000 |
| Pyrimidine Metabolism, Cytidine containing           | cytidine                                              | 0.0061000 |
| Diacylglycerol                                       | oleoyl-oleoyl-glycerol (18:1/18:1) [2]*               | 0.0078000 |
| Diacylglycerol                                       | oleoyl-linoleoyl-glycerol (18:1/18:2) [2]             | 0.0078000 |
| Diacylglycerol                                       | stearoyl-arachidonoyl-glycerol (18:0/20:4) [1]*       | 0.0079000 |
| Fatty Acid Metabolism (Acyl Choline)                 | oleoylcholine                                         | 0.0081000 |
| Diacylglycerol                                       | diacylglycerol (16:1/18:2 [2], 16:0/18:3 [1])*        | 0.0084000 |
| Histidine Metabolism                                 | N-acetylhistidine                                     | 0.0085000 |
| Diacylglycerol                                       | oleoyl-arachidonoyl-glycerol (18:1/20:4) [2]*         | 0.0089000 |
| Tetrahydrobiopterin Metabolism                       | dihydrobiopterin                                      | 0.0089000 |
| Monoacylglycerol                                     | 1-palmitoylglycerol (16:0)                            | 0.0092000 |
| Food Component/Plant                                 | cinnamoylglycine                                      | 0.0099000 |
| Phosphatidylcholine (PC)                             | 1-oleoyl-2-docosahexaenoyl-GPC (18:1/22:6)*           | 0.0112000 |
| Chemical                                             | 3-hydroxypyridine sulfate                             | 0.0122000 |
| Purine Metabolism, (Hypo)Xanthine/Inosine containing | hypoxanthine                                          | 0.0124000 |
| Food Component/Plant                                 | tartrate                                              | 0.0131000 |
| Long Chain Fatty Acid                                | myristoleate (14:1n5)                                 | 0.0138000 |
| Purine Metabolism, (Hypo)Xanthine/Inosine containing | urate                                                 | 0.0139000 |
| Nucleotide Sugar                                     | UDP-galactose                                         | 0.0143000 |
| Sphingolipid Metabolism                              | sphinganine                                           | 0.0158000 |
| Diacylglycerol                                       | palmitoyl-oleoyl-glycerol (16:0/18:1) [1]*            | 0.0160000 |
| Dipeptide                                            | valylglutamine                                        | 0.0164000 |
| Monoacylglycerol                                     | 1-docosahexaenoylglycerol (22:6)                      | 0.0164000 |
| Diacylglycerol                                       | palmitoleoyl-oleoyl-glycerol (16:1/18:1) [2]*         | 0.0166000 |
| Glycolysis, Gluconeogenesis, and Pyruvate Metabolism | fructose-6-phosphate                                  | 0.0167000 |
| Phospholipid Metabolism                              | cytidine-5'-diphosphoethanolamine                     | 0.0168000 |
| Dihydroceramides                                     | N-palmitoyl-sphinganine (d18:0/16:0)                  | 0.0173000 |
| Lysophospholipid                                     | 1-palmitoyl-GPS (16:0)*                               | 0.0176000 |
| Polyunsaturated Fatty Acid (n3 and n6)               | docosadienoate (22:2n6)                               | 0.0179000 |
| Lysine Metabolism                                    | pipecolate                                            | 0.0180000 |
| Diacylglycerol                                       | palmitoyl-oleoyl-glycerol (16:0/18:1) [2]*            | 0.0195000 |
| Pentose Phosphate Pathway                            | sedoheptulose-7-phosphate                             | 0.0202000 |
| Phospholipid Metabolism                              | choline phosphate                                     | 0.0214000 |
| Fatty Acid, Dicarboxylate                            | azelate (C9-DC)                                       | 0.0215000 |

**Supplementary Table 14.** The forty-four metabolites exhibiting the most significant genotype: sex: diet interactions. Metabolites are listed with sub-pathway to which they belong.

### Genotype:Sex:Diet interaction

p<0.01 11 metabolites

0.01<p<0.05 33 metabolites

| Sub Pathway                                | Biochemical Name                                       | p-value   |
|--------------------------------------------|--------------------------------------------------------|-----------|
| Eicosanoid                                 | 12-HETE                                                | 0.0007000 |
| Ceramides                                  | N-(2-hydroxypalmitoyl)-sphingosine (d18:1/16:0(2OH))   | 0.0012000 |
| Diacylglycerol                             | oleoyl-linoleoyl-glycerol (18:1/18:2) [2]              | 0.0029000 |
| Diacylglycerol                             | stearoyl-docosahexaenoyl-glycerol (18:0/22:6) [2]*     | 0.0037000 |
| Phosphatidylserine (PS)                    | 1-stearoyl-2-oleoyl-GPS (18:0/18:1)                    | 0.0042000 |
| Glutathione Metabolism                     | 5-oxoproline                                           | 0.0057000 |
| Glutathione Metabolism                     | glutathione, oxidized (GSSG)                           | 0.0066000 |
| Carnitine Metabolism                       | carnitine                                              | 0.0067000 |
| Guanidino and Acetamido Metabolism         | 4-guanidinobutanoate                                   | 0.0074000 |
| Lysophospholipid                           | 1-stearoyl-GPI (18:0)                                  | 0.0087000 |
| Pyrimidine Metabolism, Uracil containing   | 3-ureidopropionate                                     | 0.0097000 |
| Phosphatidylethanolamine (PE)              | 1-stearoyl-2-oleoyl-GPE (18:0/18:1)                    | 0.0103000 |
| Glutamate Metabolism                       | pyroglutamine*                                         | 0.0107000 |
| Eicosanoid                                 | 12-HHTrE                                               | 0.0112000 |
| Plasmalogen                                | 1-(1-enyl-palmitoyl)-2-oleoyl-GPE (P-16:0/18:1)*       | 0.0125000 |
| Tryptophan Metabolism                      | kynurenate                                             | 0.0137000 |
| Histidine Metabolism                       | formiminoglutamate                                     | 0.0142000 |
| Glycine, Serine and Threonine Metabolism   | betaine aldehyde                                       | 0.0144000 |
| Phospholipid Metabolism                    | glycerophosphoinositol*                                | 0.0154000 |
| Diacylglycerol                             | oleoyl-linoleoyl-glycerol (18:1/18:2) [1]              | 0.0157000 |
| Fatty Acid, Dihydroxy                      | 12,13-DiHOME                                           | 0.0183000 |
| Ceramides                                  | N-palmitoyl-sphingosine (d18:1/16:0)                   | 0.0187000 |
| Fatty Acid Synthesis                       | 2-methylmalonylcarnitine (C4-DC)                       | 0.0197000 |
| Eicosanoid                                 | prostaglandin F2alpha                                  | 0.0234000 |
| Phosphatidylinositol (PI)                  | 1-stearoyl-2-arachidonoyl-GPI (18:0/20:4)              | 0.0248000 |
| Food Component/Plant                       | N-glycolylneuraminate                                  | 0.0249000 |
| Aminosugar Metabolism                      | N-acetylglucosamine/N-acetylgalactosamine              | 0.0273000 |
| Diacylglycerol                             | stearoyl-linoleoyl-glycerol (18:0/18:2) [2]*           | 0.0275000 |
| Fatty Acid Metabolism (Acyl Choline)       | palmitoylethanolamine                                  | 0.0284000 |
| Glutathione Metabolism                     | cysteine-glutathione disulfide                         | 0.0293000 |
| Phospholipid Metabolism                    | choline                                                | 0.0303000 |
| Histidine Metabolism                       | N-acetyl-3-methylhistidine*                            | 0.0312000 |
| Leucine, Isoleucine and Valine Metabolism  | tylglycarnitine (C5:1-DC)                              | 0.0336000 |
| Tryptophan Metabolism                      | picolinate                                             | 0.0367000 |
| Ceramides                                  | N-erucoyl-sphingosine (d18:1/22:1)*                    | 0.0371000 |
| Phosphatidylethanolamine (PE)              | 1-stearoyl-2-arachidonoyl-GPE (18:0/20:4)              | 0.0385000 |
| Sphingolipid Metabolism                    | sphingomyelin (d18:1/22:1, d18:2/22:0, d16:1/24:1)*    | 0.0386000 |
| Pyrimidine Metabolism, Cytidine containing | 5-methyl-2'-deoxycytidine                              | 0.0404000 |
| Leucine, Isoleucine and Valine Metabolism  | ethylmalonate                                          | 0.0408000 |
| Gamma-glutamyl Amino Acid                  | gamma-glutamyltryptophan                               | 0.0421000 |
| Aminosugar Metabolism                      | N-acetylneuraminate                                    | 0.0424000 |
| Lysine Metabolism                          | glutaryl carnitine (C5-DC)                             | 0.0457000 |
| Lysophospholipid                           | 1-stearoyl-GPC (18:0)                                  | 0.0461000 |
| Plasmalogen                                | 1-(1-enyl-palmitoyl)-2-arachidonoyl-GPE (P-16:0/20:4)* | 0.0500000 |
| Histidine Metabolism                       | 4-imidazoleacetate                                     | 0.0509000 |
| Phosphatidylethanolamine (PE)              | 1-palmitoyl-2-docosahexaenoyl-GPE (16:0/22:6)*         | 0.0525000 |
